# Supplementary material for: Predictors of early death in female patients with breast cancer in the UK: a cohort study
Source: PubMed Central journal article supplement — BMJ Open. 2011 Nov 28;1(2):e000247. doi: 10.1136/bmjopen-2011-000247 (PMC3227804; doi:10.1136/bmjopen-2011-000247), 2011-11-28
Supplement: bmjopen-2011-000247.draft_revisions.pdf [file bmjopen-2011-000247.draft_revisions.pdf]

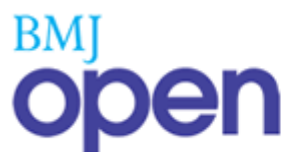

**Predictors of early death in female breast cancer patients in the UK: a cohort study.**

|                                 |                                                                                                                                                                                                                                                                                                                                         |
|---------------------------------|-----------------------------------------------------------------------------------------------------------------------------------------------------------------------------------------------------------------------------------------------------------------------------------------------------------------------------------------|
| Journal:                        | <i>BMJ Open</i>                                                                                                                                                                                                                                                                                                                         |
| Manuscript ID:                  | bmjopen-2011-000247                                                                                                                                                                                                                                                                                                                     |
| Article Type:                   | Research                                                                                                                                                                                                                                                                                                                                |
| Date Submitted by the Author:   | 01-Jul-2011                                                                                                                                                                                                                                                                                                                             |
| Complete List of Authors:       | Stapelkamp, Ceilidh; Kings College London, Thames Cancer Registry<br>Holmberg, Lars; Kings College London, Division of Cancer Studies<br>Tataru, Daniela; Kings College London, Thames Cancer Registry<br>Moller, Henrik; Kings College London, Thames Cancer Registry<br>Robinson, David; Kings College London, Thames Cancer Registry |
| <b>Primary Subject Heading</b>: | Oncology                                                                                                                                                                                                                                                                                                                                |
| Keywords:                       | Breast tumours < ONCOLOGY, Organisation of health services < HEALTH SERVICES ADMINISTRATION & MANAGEMENT, ONCOLOGY                                                                                                                                                                                                                      |
|                                 |                                                                                                                                                                                                                                                                                                                                         |

SCHOLARONE™  
Manuscripts

only

1  
2  
3 **Title page**  
4

5 **Predictors of early death in female breast cancer patients in the UK: a cohort study.**  
6

7 *Ceilidh Stapelkamp, Lars Holmberg, Daniela Tataru, Henrik Møller, David Robinson*  
8

9  
10 Ceilidh Stapelkamp  
11 Research Analyst  
12 King's College London, Thames Cancer Registry  
13 Capital House  
14 42 Weston Street  
15 London SE1 3QD  
16

17 Lars Holmberg  
18 Professor of Cancer Epidemiology  
19 Division of Cancer Studies, Cancer Epidemiology Group  
20 Research Oncology  
21 3rd Floor, Bermondsey Wing  
22 Guy's Hospital  
23 London SE1 9RT  
24

25 Daniela Tataru  
26 Information Analyst  
27 King's College London, Thames Cancer Registry  
28 Capital House  
29 42 Weston Street  
30 London SE1 3QD  
31

32 Henrik Møller  
33 Director Thames Cancer Registry  
34 King's College London, Thames Cancer Registry  
35 Capital House  
36 42 Weston Street  
37 London SE1 3QD  
38

39 David Robinson  
40 Honorary Senior Lecturer  
41 King's College London, Thames Cancer Registry  
42 Capital House  
43 42 Weston Street  
44 London SE1 3QD  
45

46 Corresponding author

47 Lars Holmberg  
48 Professor of Cancer Epidemiology  
49 Division of Cancer Studies, Cancer Epidemiology Group  
50 Research Oncology  
51 3rd Floor, Bermondsey Wing  
52 Guy's Hospital  
53 London SE1 9RT  
54 Email: *lars.holmberg@kcl.ac.uk*  
55  
56  
57  
58  
59  
60

## Abstract

**Objectives:** To identify factors predicting early death in women with breast cancer. **Design:** Cohort study. **Setting:** 29 trusts across six cancer networks in the North Thames area. **Participants:** 15,037 women with primary breast cancer diagnosed between January 1996 and December 2005. **Methods:** Logistic regression analyses to determine predictors of early death and factors associated with lack of surgical treatment. **Main exposures:** Age at diagnosis, mode of presentation, ethnicity, disease severity, comorbidities, treatment and period of diagnosis in relation to the Cancer Plan. **Main outcome measures:** Death from any cause within one year of diagnosis, and receipt of surgical treatment. **Results:** By 31<sup>st</sup> December 2006 4,765 women had died, 980 in the year after diagnosis. Older age and disease severity independently predicted early death. Women over 80 were more likely to die early than women under 50 (OR 8.05, 95% CI 5.96 to 10.88). Presence of distant metastases on diagnosis increased the odds of early death more than eight-fold (OR 8.41, 95% CI 6.49 to 10.89). Two or more recorded comorbidities were associated with a nearly four-fold increase. There was a significant decrease in odds associated with surgery (OR 0.29, 95% CI 0.24 to 0.35). Independently of disease severity and comorbidities, women over 70 were less likely than those under 50 to be treated surgically and this was even more pronounced in those aged over 80 (OR 0.09, 95% CI 0.07 to 0.10). Other factors independently associated with a reduced likelihood of surgery included a non-screening presentation, non-white ethnicity and additional comorbidities. **Conclusions:** These findings may partially explain the survival discrepancies between the UK and other European countries in female breast cancer patients. The study identifies a group of women with a particularly poor prognosis for whom interventions aiming at early detection may be targeted.

**ARTICLE FOCUS**

- Several studies have shown that the UK has lower survival for breast cancer than some other European countries with a similar expenditure on health care.
- Differences have been shown to occur mainly in older patients and in the first year after diagnosis.
- Several reasons/explanations have been proposed.

**KEY MESSAGES**

- This study shows that breast cancer patients dying in the first year after diagnosis are more likely to be older, have more advanced disease and existing comorbidities.
- Surgical treatment and (to a lesser extent) radiotherapy and tamoxifen usage were associated with a reduced risk of early death.
- The likelihood of receiving surgery was inversely related to age, independently of comorbidity and disease severity.
- These findings suggest that early detection, management of comorbidities and optimization of treatment of older patients are important target areas to improve outcomes.

**STRENGTHS AND LIMITATIONS**

- This is a large cohort of women diagnosed with breast cancer and the results may be generalisable to women treated for breast cancer in the UK during the same time period.
- Many variables that may be related to both risk factors and outcomes have not been assessed in this study. However, their correlation with death within a year would have to be very strong to explain the strong associations seen in our data.

## Introduction

Despite the decline in breast cancer mortality rates seen in the UK since the late 1980s, survival rates are still substantially lower than in many other European countries.<sup>1,2</sup> It has been difficult to pinpoint the reasons for these differences. Beral and Peto<sup>3</sup> have suggested that they may be due to bias relating to artefacts in cancer registration rather than to genuine differences in diagnosis and management of breast cancer. However, a recent study by Møller et al<sup>4</sup> has shown that such effects are unlikely to make a significant contribution to observed differences in survival. The effects of incomplete ascertainment and registration from death certificates only on survival comparisons based on cancer registry data have been investigated in detail by Robinson et al.<sup>5</sup>

One important observation in some studies remains unexplained, namely that of poorer survival in UK patients soon after their diagnosis. Sant et al<sup>6</sup> demonstrated a higher risk of death in women with breast cancer in the UK in the first six months after diagnosis than in other European countries. This was particularly pronounced for the youngest (under 29 years) and oldest (over 80 years) age groups. Six months from diagnosis, survival patterns in the UK became more similar to those in the other European countries. Further analysis of the survival differential has revealed that disparities between the UK and northern European countries (Sweden and Norway) occur mainly for older women in the first year after diagnosis.<sup>7</sup> Eighty-one percent of the excess UK deaths occur within two years of diagnosis.

The aim of this study was to investigate factors associated with early mortality (within one year following diagnosis) in a sample of UK women diagnosed with breast cancer during 1996-2005. Since surgical intervention with a curative intent is strongly related to reduced mortality, a secondary aim of the study was to identify the patient characteristics most often associated with the failure to use this treatment option.

## Subjects and methods

We conducted a cohort study using data from the North Thames Prospective Audit of Breast Cancer, set up in 1996 by Health Authorities in the North Thames area to monitor the implementation of the Calman-Hine recommendations in 29 trusts in six participating cancer networks: North London, North East London, West London, South West London, Mount Vernon and Mid-Anglia. Providers submitted detailed demographic, diagnostic and treatment data for all new primary cases of malignant female breast cancer diagnosed between January 1996 and December 2005. The number of participating trusts varied from year to year, with a maximum of 26 trusts submitting partial or complete datasets in 2000 and a minimum of seven trusts submitting data in 2005.

Women were followed from their date of entry into the audit to death or censoring at 31<sup>st</sup> December 2006, an average of 5.6 years. Date of death was confirmed through linking patients to the NHS Central Register using the NHS Strategic Tracing Service (NSTS) or matching with records in the Thames Cancer Registry (TCR). For those who were neither traced nor matched, date of death was

1  
2  
3 taken from the breast audit database, if it was recorded. Women who were either traced or matched  
4 but who had no date of death in any of the three databases were assumed to be alive at 31<sup>st</sup>  
5  
6 December 2006. Women who could not be traced in the NHS Central Register or matched to the TCR  
7  
8 database and who had no date of death recorded in the audit database were excluded from analyses,  
9  
10 as we could not be sure of their vital status. The study also excluded women with *in situ* breast cancer  
11  
12 without any invasive component at diagnosis. After these exclusions, a total of 15,037 women were  
13  
14 available for analysis.

15  
16 Data on different treatment modes (surgery, radiotherapy, chemotherapy and tamoxifen) were taken  
17  
18 from the Audit database, augmented by information from the TCR database where possible. Cases  
19  
20 were matched to Hospital Episode Statistics (HES) data using name, NHS number, date of birth, and  
21  
22 date of diagnosis within 90 days of that recorded in the audit database in order to obtain further  
23  
24 information on receipt of surgery. Women with a C50 diagnosis (breast cancer) and a B or T8 code in  
25  
26 the HES surgery field were regarded as having had surgery. Only 98 cases were re-coded on this  
27  
28 basis, illustrating the completeness of the audit database in this respect.

29  
30 Cause of death was available from the TCR database for 85% of the women who died during the  
31  
32 study period. A categorical variable accounting for calendar period of diagnosis was included to adjust  
33  
34 for diagnosis and treatment in relation to the implementation of the Cancer Plan. As per the  
35  
36 methodology of Rachet et al<sup>8</sup>, the following periods were considered: before 27/09/2000 (when the  
37  
38 plan was published); 28/09/2000-31/12/2003 (initialization period); after 01/01/2004 (implementation).  
39  
40 Patient age was categorized as: <50 years, 50 to 59 years, 60 to 69 years, 70 to 79 years and 80  
41  
42 years and over. Pathological tumour size was assigned to one of five groups: <10mm, 10 to 19mm,  
43  
44 20 to 39mm, 40 to 49mm and 50mm and over. Information on existing comorbidities was obtained  
45  
46 from the matched HES dataset. This information was then summarised using the Charlson  
47  
48 Comorbidity Index (0, 1 or 2+).<sup>9</sup>

49  
50 Clinical, demographic, pathological and treatment-related factors were compared between women  
51  
52 who died from any cause within one year of their diagnosis and those who survived beyond this year.  
53  
54 Univariate analyses were performed using chi<sup>2</sup> tests and unadjusted (bivariate) logistic regression  
55  
56 models. A multivariate logistic regression model investigated the independent contribution of all  
57  
58 covariates. This model included surgery but not collinear covariates, i.e. variables that were only  
59  
60 known for patients who had surgery, namely tumour size and node status.

The regression models assessed the effects of age, ethnicity, mode of presentation (screening,  
symptoms or incidental), distant metastases at diagnosis, comorbidities, period of diagnosis and  
treatments (surgery, radiotherapy, tamoxifen and chemotherapy) on early death from any cause. The

1  
2  
3 results are presented as odds ratios (ORs), both unadjusted (univariate) and fully adjusted  
4 (multivariate), with 95% confidence intervals (CIs).  
5  
6  
7

8 Additional logistic regression models were used to determine which factors were associated with use  
9 of surgery. All analyses were conducted using STATA 10.  
10  
11

## 12 **Results**

13  
14 The study population consisted of 15,037 women of whom 4,456 (30%) were over 70 years old at the  
15 time of their diagnosis. The majority of women (78%) presented symptomatically, and 82% of those  
16 with known ethnicity were recorded as white. Over a mean follow up of 5.6 years there were 4,765  
17 deaths. Table 1 shows the underlying cause of death in these women. 980 women (6.5% of the total)  
18 died within a year of their diagnosis, and of these 464 women were known to have died from breast  
19 cancer. Amongst those for whom the cause of death was known, there was no significant difference in  
20 the proportions dying from different causes between those who died within or after the first year since  
21 diagnosis ( $\chi^2 = 10.6$ ; 9 df;  $p = 0.30$ ). However, significantly more of the women who died early had  
22 an unrecorded cause of death (26% versus 12%).  
23  
24  
25  
26  
27  
28  
29

30 Table 2 describes the characteristics of women who survived one year beyond diagnosis and those  
31 who did not, and Table 3 shows the results of the logistic regression analyses. In univariate analyses  
32 ( $\chi^2$  values in Table 2 and unadjusted odds ratios in Table 3), older age (>60 years), white ethnicity,  
33 distant metastases at diagnosis, positive nodes and larger tumours (>20mm) were all significantly  
34 linked with death within one year of diagnosis ( $p < 0.001$  for all  $\chi^2$  tests). Comorbidities on diagnosis  
35 were also associated with an increased likelihood of early death (Charlson Index  $\geq 2$ : OR 5.55, 95%  
36 CI 4.56 to 6.76). Women presenting because of symptoms (OR 7.91, 95% CI 5.21 to 12.01) or whose  
37 cancer was discovered incidentally (OR 11.98, 95% CI 7.37 to 19.48) were significantly more likely to  
38 die early, compared to those whose cancer was identified through screening.  
39  
40  
41  
42  
43  
44

45 Surgical treatment was associated with highly significantly reduced odds of early death from any  
46 cause (OR 0.12, 95% CI 0.11 to 0.14), as was treatment with chemotherapy (OR 0.60, 95% CI 0.51 to  
47 0.71) and radiotherapy (OR 0.27, 95% CI 0.23 to 0.32). There was no significant association between  
48 tamoxifen usage and early death (OR 0.94, 95% CI 0.79 to 1.12). The time period in which women  
49 were diagnosed (before, during or after implementation of the Cancer Plan) was not significantly  
50 associated with death within a year of diagnosis in univariate models ( $\chi^2 = 3.54$ ;  $p = 0.17$ ).  
51  
52  
53  
54  
55

56 The results of the multivariate logistic regression analysis to assess the factors independently  
57 associated with early death are shown as the adjusted odds ratios in Table 3. This model excluded  
58 tumour size and nodal status, which are only known in women who received surgical treatment. There  
59 was a clear and independent association between increasing age and the risk of early death, with an  
60



1  
2  
3 eight-fold increase in the odds of early death in women aged 80 or more compared to those aged <  
4 50 at diagnosis (OR: 8.05, 95% CI 5.96 to 10.88). In this adjusted analysis, white ethnicity was not  
5 6 independently associated with early death. The significant associations noted in the univariate  
7 8 analyses were upheld (though generally attenuated) in the multivariate model, except for  
9 10 chemotherapy. Women receiving chemotherapy were more likely than those not treated with  
11 12 chemotherapy to die within a year of their diagnosis (OR 1.49, 95% CI 1.19 to 1.86). Surgery was  
13 14 associated with a reduced risk of early death (OR 0.29, 95% CI 0.24 to 0.35), as was radiotherapy  
15 16 (OR 0.61, 95% CI 0.51 to 0.74) and also tamoxifen (OR 0.64, 95% CI 0.51 to 0.80). Women who were  
17 18 most recently diagnosed with breast cancer (post-2003) were less likely to die early (OR 0.71, 95% CI  
19 0.52 to 0.98). Women with missing data for ethnicity, presentation or metastases were at increased  
20 risk of early death compared to the reference categories.

21 Overall, 13.3% of women did not have surgery as part of their treatment (Table 2), and this proportion  
22 23 was significantly greater in women who died within a year of diagnosis (50% vs. 11%). The  
24 25 characteristics of women who did or did not receive surgical treatment are shown in Table 4. Those  
26 27 receiving surgery were significantly younger, and were more likely to present via screening, to be free  
28 29 of metastases at diagnosis and to have fewer comorbidities. For those of known ethnicity, there was  
30 31 no difference in the proportions receiving surgery between white and non-white women. However, the  
32 33 proportion of cases with unknown ethnicity was significantly greater in those not receiving surgery  
34 (38.7% versus 23.8%).

35 In multivariate analysis (Table 5), mode of presentation, older age (particularly > 80 years), distant  
36 37 metastases on presentation and comorbidities were independent predictors of no surgical treatment  
38 39 (70-79 years old versus < 50 years old: OR 0.27, 95% CI 0.23 to 0.33; > 80 years old versus < 50  
40 41 years old: OR 0.09, 95% CI 0.07 to 0.10; symptomatic presentation versus screening: OR 0.34, 95%  
42 43 CI 0.26 to 0.45; incidental presentation versus screening: OR 0.28, 95% CI 0.20 to 0.40; distant  
44 45 metastases on diagnosis: OR 0.16, 95% CI 0.12 to 0.20; severe comorbidities: OR 0.50, 95% CI 0.41  
46 47 to 0.62). White ethnicity was independently linked with an increased likelihood of surgical treatment  
48 compared to non-white ethnicity (OR 1.39, 95% CI 1.16 to 1.65).

## 48 Discussion

49 This study in more than 15,000 women diagnosed with breast cancer in the North Thames area found  
50 51 that age and disease severity at diagnosis were independent predictors of early death from any  
52 53 cause. In the women analysed here, distant metastases on diagnosis were a strong predictor of early  
54 55 death, increasing the odds of dying within a year of diagnosis more than eight-fold (OR 8.41, 95% CI  
56 57 6.49 to 10.89). This effect was independent of age, comorbidities and treatment. Surgery was strongly  
58 59 associated with a reduced risk of early death, and older patients were less likely to receive surgery.  
60



1  
2  
3 Radiotherapy and tamoxifen treatments were independently associated with reduced likelihood of  
4 early death, while chemotherapy was associated with increased odds of dying within a year of  
5 diagnosis (OR 1.49, 95% 1.19 to 1.86). This relationship with chemotherapy is likely to be a reflection  
6 of selection bias, whereby only the most severe cases are given this form of treatment. A similar bias,  
7 but in the opposite direction, may apply to surgery – i.e. with very ill patients selectively not being  
8 operated upon. However, the association between surgery and death within one year remained  
9 apparent in a model correcting for age and co-morbidity. These findings are consistent with those in a  
10 recent study by Brewster et al<sup>10</sup> that found age, deprivation, emergency admission, tumour stage and  
11 grade and absence of treatment were independent factors associated with death within 30 days of  
12 diagnosis.

13  
14  
15  
16  
17  
18  
19  
20 Poorer prognosis of older women with breast cancer has been attributed variously to treatment  
21 received,<sup>11-18</sup> more severe disease on presentation<sup>14;19-22</sup> and to the presence of comorbidities.<sup>11</sup>  
22 Stage was identified as the most important factor explaining breast cancer survival discrepancies  
23 between European countries for women diagnosed between 1990 and 1992,<sup>20</sup> particularly in older  
24 age groups.

25  
26  
27  
28  
29 Patient comorbidity has been shown to be a potentially important confounder in studies of treatment  
30 received,<sup>16;23</sup> but our analyses suggest that older women are less likely to receive surgery even after  
31 adjusting for comorbidities. A recent report from the National Cancer Intelligence Network based on  
32 data from 2007 confirms a high proportion of older women in the UK do not receive surgical  
33 treatment: 61% of women aged over 80 did not have surgery.<sup>24</sup> This group is likely to have a  
34 particularly poor prognosis. Nearly 40% of women who died early in our study were aged over 80  
35 years and 66% (252/383) of them had not had surgery.

36  
37  
38  
39  
40  
41 Age was strongly inversely associated with the likelihood of receiving surgery. This reflects the well  
42 described pattern in other studies that older women are less likely to receive treatment than younger  
43 women.<sup>11;25</sup> Women over 80 years old attending breast units in Manchester in 2002, for example,  
44 were less likely to have surgery than women aged 65 to 79 years even after adjusting for poorer  
45 general health, including comorbidities.<sup>12</sup>

46  
47  
48  
49  
50  
51 Great improvements in cancer services have been made during the past decade. To investigate  
52 whether the implementation of the Cancer Plan has had any observable effect on survival, this  
53 research included a categorical variable controlling for calendar period of diagnosis in the multivariate  
54 analyses. This method was similar to that employed by Rachet et al<sup>8</sup> in their assessment of the NHS  
55 Cancer Plan for England. In our study, women diagnosed after 2003 had reduced odds of early death  
56 compared to women diagnosed before the Cancer Plan was published (OR 0.71, 95% CI 0.52 to  
57 0.98). This is suggestive of a survival benefit resulting from changes to cancer services after 2000.

1  
2  
3  
4  
5 While women of white ethnicity were at greater odds of early death in univariate analyses, this  
6 association was no longer significant when the model was adjusted for the other covariates. The white  
7 women were in general older than the non-white women, and this may explain these findings.  
8 However, in the adjusted analysis, white women were more likely to be treated surgically than those  
9 belonging to non-white ethnic groups.  
10  
11  
12

13  
14  
15 Our results may be generalisable to women treated for breast cancer in the UK during the same time  
16 period. Five-year relative survival of this sample (based on life tables for London during the period  
17 1996-2001) was 84.1%. This compares well with recent estimates from the Office for National  
18 Statistics,<sup>26</sup> which reports a value of 82% for women diagnosed between 2000 and 2006.  
19  
20  
21

22  
23 We suspect a complex relationship between the exposures studied here, some of which may be on  
24 the same causal pathway for early death. For example, high age and comorbidity may be rational and  
25 adequate reasons for not offering surgery. While a number of patient and treatment characteristics  
26 were strongly and independently linked with early death, these associations must be interpreted with  
27 caution and with a consideration for unmeasured confounding factors. For instance, the selection of a  
28 patient's treatment will depend on a number of factors, including some not measured here such as  
29 their own preferences or established practices within the organisation in which they are treated.<sup>27</sup>  
30 Furthermore, their presentation to health services depends, among other factors, on access to  
31 treatment and knowledge of cancer symptoms. Many of these variables may be linked to both risk  
32 factors and outcomes and they have not been assessed in this study. However, for any underlying  
33 confounder to explain the strong statistical associations seen in our data, they would need to have a  
34 very strong correlation with death within a year of diagnosis.  
35  
36  
37  
38  
39  
40  
41

42  
43 Another potential limitation of this study is missing information. Women with missing data on ethnicity,  
44 presentation and distant metastases were more likely to die within a year of their diagnosis and were  
45 less likely to receive surgical treatment. They may represent women who were seriously ill at  
46 diagnosis and who were not scheduled for surgery. An analysis of the characteristics of patients with  
47 several missing data elements suggests that these women tend to be older, have more severe  
48 disease (as determined by a proxy of tumour size) and are more likely to die early. A failure to record  
49 important details relating to their diagnosis and treatment may be a reflection of the care they receive.  
50 With respect to this study, if women with missing information have worse disease and are generally  
51 older, then the estimates of association between these variables and early death will be biased  
52 towards underestimates of the true effects.  
53  
54  
55  
56  
57  
58  
59  
60

1  
2  
3 Retrospective analyses rely on records in which some information may be inaccurate. In this study a  
4 particular effort was made to ensure that the surgical status of women was recorded correctly as this  
5 was considered an important marker of the quality of treatment and was expected to be strongly  
6 associated with outcome. Time and resource constraints precluded this additional effort being  
7 extended to other variables to verify database entries. However, an earlier study looking at trends in  
8 the treatment of breast cancer,<sup>28</sup> concluded that the audit database was a reasonably reliable source  
9 of such data.  
10  
11  
12  
13  
14  
15

16 The effects of deprivation on disease severity and ultimately on mortality were not explored in this  
17 study. Such analyses rely on potential patient identifiers such as postcode data that were not  
18 available to us. Deprivation has been linked to poorer patient outcomes for UK breast cancer patients  
19 in several studies<sup>10;29-31</sup> and stated aims of the Cancer Plan and the Cancer Reform Strategy<sup>32-34</sup> are  
20 to tackle the inequalities in cancer survival between different socioeconomic groups in England.  
21  
22  
23  
24

## 25 **Conclusions**

26  
27  
28 Our findings offer more detailed insights into the determinants of death in the first year after a  
29 diagnosis of breast cancer, a period shown to be important in international comparisons. As expected,  
30 early death is linked to older age and to the presence of comorbidities. Comorbidities can be  
31 addressed in the long run through general health policy, but two other determinants of early death  
32 identified by this study are potential avenues for intervention.  
33  
34

35  
36 Firstly, the findings relating to disease severity lend empirical support to the notion that late diagnosis  
37 is a major determinant of early death. This supports the rationale for projects that focus on increasing  
38 awareness of breast symptoms and the importance of screening. Secondly, surgery is independently  
39 associated with a large reduction in the risk of early death, and older women were – independently of  
40 disease severity and comorbidity - much less likely to receive surgery. Assuming surgery is an  
41 indicator of attempts at curative treatment, there may be benefits of increased treatment activity for  
42 older women.  
43  
44  
45  
46  
47  
48  
49  
50  
51  
52  
53  
54  
55  
56  
57  
58  
59  
60

Table 1: Cause of death in women with breast cancer, by length of survival

| Cause of death                  | Survival                                |                                         | Total<br>Number (%) |
|---------------------------------|-----------------------------------------|-----------------------------------------|---------------------|
|                                 | <1 year from<br>diagnosis<br>Number (%) | >1 year from<br>diagnosis<br>Number (%) |                     |
| Breast cancer                   | 464 (63.9)                              | 2,015 (60.5)                            | 2,479 (61.1)        |
| Lung cancer                     | 4 (0.6)                                 | 38 (1.1)                                | 42 (1.0)            |
| Colorectal cancer               | 3 (0.4)                                 | 32 (1.0)                                | 35 (0.9)            |
| Other/Unspecified cancer        | 39 (5.4)                                | 232 (7.0)                               | 271 (6.7)           |
| Ischaemic Heart Disease         | 34 (4.7)                                | 137 (4.1)                               | 171 (4.2)           |
| Stroke                          | 14 (1.9)                                | 79 (2.4)                                | 93 (2.3)            |
| Other Cardiovascular Disease    | 43 (5.9)                                | 204 (6.1)                               | 247 (6.1)           |
| Senility                        | 16 (2.2)                                | 92 (2.8)                                | 108 (2.7)           |
| Pneumonia                       | 38 (5.2)                                | 205 (6.2)                               | 243 (6.0)           |
| All other causes                | 71 (9.8)                                | 294 (8.8)                               | 365 (9.0)           |
| Total with known cause of death | 726 (100.0)                             | 3328 (100.0)                            | 4054 (100.0)        |
| Cause of death not known        | 254 (25.9)                              | 457 (12.1)                              | 711 (14.9)          |
| Total cases                     | 980                                     | 3,785                                   | 4,765               |

**Table 2: Characteristics of participants who did or did not survive first year after diagnosis**

| Patient characteristics         | Survival                             |                                      | P-value*      |         |
|---------------------------------|--------------------------------------|--------------------------------------|---------------|---------|
|                                 | <1 year from diagnosis<br>Number (%) | >1 year from diagnosis<br>Number (%) |               |         |
| Age at diagnosis (years)        |                                      |                                      |               |         |
|                                 | <50                                  | 88 (9.0)                             | 3,712 (26.4)  | < 0.001 |
|                                 | 50-59                                | 91 (9.3)                             | 3,648 (26.0)  |         |
|                                 | 60-69                                | 148 (15.1)                           | 2,894 (20.6)  |         |
|                                 | 70-79                                | 270 (27.6)                           | 2,373 (16.9)  |         |
|                                 | >80                                  | 383 (39.1)                           | 1,430 (10.2)  |         |
| Ethnicity                       |                                      |                                      |               |         |
|                                 | Non-white                            | 75 (7.7)                             | 1,983 (14.1)  | < 0.001 |
|                                 | White                                | 488 (49.8)                           | 8,610 (61.3)  |         |
|                                 | Not known                            | 417 (42.6)                           | 3,464 (24.6)  |         |
| Presentation                    |                                      |                                      |               |         |
|                                 | Screening                            | 23 (2.3)                             | 2,274 (16.2)  | < 0.001 |
|                                 | Symptoms                             | 763 (77.9)                           | 9,531 (67.8)  |         |
|                                 | Incidental                           | 64 (6.5)                             | 528 (3.8)     |         |
|                                 | Not known                            | 130 (13.3)                           | 1,724 (12.3)  |         |
| Distant metastases at diagnosis |                                      |                                      |               |         |
|                                 | No                                   | 312 (31.8)                           | 7,977 (56.7)  | < 0.001 |
|                                 | Yes                                  | 156 (15.9)                           | 271 (1.9)     |         |
|                                 | Not known                            | 512 (52.2)                           | 5,809 (41.3)  |         |
| Tumour size (mm)                |                                      |                                      |               |         |
|                                 | <10                                  | 12 (1.2)                             | 1,220 (8.7)   | < 0.001 |
|                                 | 10-19                                | 73 (7.4)                             | 4,016 (28.6)  |         |
|                                 | 20-39                                | 83 (8.5)                             | 3,103 (22.1)  |         |
|                                 | 40-49                                | 86 (8.8)                             | 1,953 (13.9)  |         |
|                                 | ≥50                                  | 99 (10.1)                            | 799 (5.7)     |         |
|                                 | Not known                            | 627 (64.0)                           | 2,966 (21.1)  |         |
| Node status                     |                                      |                                      |               |         |
|                                 | Negative                             | 95 (9.7)                             | 5,492 (39.1)  | < 0.001 |
|                                 | Positive                             | 167 (17.0)                           | 4,213 (30.0)  |         |
|                                 | Not known                            | 718 (73.3)                           | 4,352 (31.0)  |         |
| Surgery                         |                                      |                                      |               |         |
|                                 | No                                   | 489 (49.9)                           | 1,513 (10.8)  | < 0.001 |
|                                 | Yes                                  | 491 (50.1)                           | 12,544 (89.2) |         |
| Radiotherapy                    |                                      |                                      |               |         |
|                                 | No                                   | 454 (46.3)                           | 3,395 (24.2)  | < 0.001 |
|                                 | Yes                                  | 256 (26.1)                           | 7,079 (50.4)  |         |
|                                 | Not known                            | 270 (27.6)                           | 3,583 (25.5)  |         |
| Chemotherapy                    |                                      |                                      |               |         |
|                                 | No                                   | 520 (53.1)                           | 6,482 (46.1)  | < 0.001 |
|                                 | Yes                                  | 203 (20.7)                           | 4,200 (29.9)  |         |
|                                 | Not known                            | 257 (26.2)                           | 3,375 (24.0)  |         |

|                                |              |            |              |         |
|--------------------------------|--------------|------------|--------------|---------|
| Tamoxifen                      | No           | 172 (17.6) | 2,321 (16.5) | 0.49    |
|                                | Yes          | 601 (61.3) | 8,630 (61.4) |         |
|                                | Not known    | 207 (21.1) | 3,106 (22.1) |         |
| Charlson index (comorbidities) | 0 (minor)    | 203 (20.7) | 6,755 (48.1) | < 0.001 |
|                                | 1 (moderate) | 48 (4.9)   | 359 (2.6)    |         |
|                                | ≥ 2 (severe) | 231 (23.6) | 1,384 (9.8)  |         |
|                                | Not known    | 498 (50.8) | 5,559 (39.5) |         |
| Cancer plan (diagnosis date)   | pre 2000     | 624 (63.7) | 9,057 (64.4) | 0.79    |
|                                | 2000 to 2003 | 292 (29.8) | 3,897 (27.7) |         |
|                                | post 2003    | 64 (6.5)   | 1,103 (7.8)  |         |
| Total cases                    |              | 980        | 14,057       |         |

\* P-value for comparison of proportions, excluding 'not known' category where present. For age, tumour size, Charlson index and cancer plan test is for trend; for all other factors test is for heterogeneity.

**Table 3: Crude and adjusted odds ratios and 95% confidence intervals for early death from any cause**

| Factor                             | Number of cases | Early deaths<br>Number (%) | Odds Ratios |                     |               |                     |              |
|------------------------------------|-----------------|----------------------------|-------------|---------------------|---------------|---------------------|--------------|
|                                    |                 |                            | Unadjusted  |                     | Adjusted      |                     |              |
|                                    |                 |                            | Odds Ratio  | Confidence Interval | Odds Ratio    | Confidence Interval |              |
| Age at diagnosis<br>(years)        | < 50            | 3,800                      | 88 (2.3)    | 1.00                | -             | 1.00                | -            |
|                                    | 50 - 59         | 3,739                      | 91 (2.4)    | 1.05                | 0.78 - 1.42   | 1.41                | 1.03 - 1.93  |
|                                    | 60 - 69         | 3,042                      | 148 (4.9)   | 2.16                | 1.65 - 2.82   | 2.61                | 1.94 - 3.50  |
|                                    | 70 - 79         | 2,643                      | 270 (10.2)  | 4.80                | 3.75 - 6.14   | 4.62                | 3.45 - 6.18  |
|                                    | 80 +            | 1,813                      | 383 (21.1)  | 11.30               | 8.89 - 14.36  | 8.05                | 5.96 - 10.88 |
| Ethnicity                          | Non-white       | 2,058                      | 75 (3.6)    | 1.00                | -             | 1.00                | -            |
|                                    | White           | 9,098                      | 488 (5.4)   | 1.50                | 1.17 - 1.92   | 1.25                | 0.96 - 1.63  |
|                                    | Not known       | 3,881                      | 417 (10.7)  | 3.18                | 2.47 - 4.09   | 2.24                | 1.70 - 2.94  |
| Presentation                       | Screening       | 2,297                      | 23 (1.0)    | 1.00                | -             | 1.00                | -            |
|                                    | Symptoms        | 10,294                     | 763 (7.4)   | 7.91                | 5.21 - 12.01  | 3.31                | 2.13 - 5.14  |
|                                    | Incidental      | 592                        | 64 (10.8)   | 11.98               | 7.37 - 19.48  | 3.92                | 2.30 - 6.66  |
|                                    | Not known       | 1,854                      | 130 (7.0)   | 7.46                | 4.76 - 11.67  | 2.77                | 1.72 - 4.48  |
| Distant metastases<br>at diagnosis | No              | 8,289                      | 312 (3.8)   | 1.00                | -             | 1.00                | -            |
|                                    | Yes             | 427                        | 156 (36.5)  | 14.72               | 11.73 - 18.47 | 8.41                | 6.49 - 10.89 |
|                                    | Not known       | 6,321                      | 512 (8.1)   | 2.25                | 1.95 - 2.60   | 1.35                | 1.13 - 1.60  |
| Tumour size (mm)                   | < 10            | 1,232                      | 12 (1.0)    | 1.00                | -             | -                   | -            |
|                                    | 10-19           | 4,089                      | 73 (1.8)    | 1.85                | 1.00 - 3.41   | -                   | -            |
|                                    | 20 - 39         | 3,186                      | 83 (2.6)    | 2.72                | 1.48 - 5.00   | -                   | -            |
|                                    | 40 - 49         | 2,039                      | 86 (4.2)    | 4.48                | 2.44 - 8.22   | -                   | -            |
|                                    | 50 +            | 898                        | 99 (11.0)   | 12.60               | 6.87 - 23.08  | -                   | -            |
|                                    | Not known       | 3,593                      | 627 (17.4)  | 21.49               | 12.09 - 38.20 | -                   | -            |
| Node status                        | Negative        | 5,587                      | 95 (1.7)    | 1.00                | -             | -                   | -            |



|                                   |              |        |            |      |              |      |             |
|-----------------------------------|--------------|--------|------------|------|--------------|------|-------------|
|                                   | Positive     | 4,380  | 167 (3.8)  | 2.29 | 1.78 - 2.96  | -    | -           |
|                                   | Not known    | 5,070  | 718 (14.2) | 9.54 | 7.67 - 11.86 | -    | -           |
| Surgery                           | No           | 2,002  | 489 (24.4) | 1.00 | -            | 1.00 | -           |
|                                   | Yes          | 13,035 | 491 (3.8)  | 0.12 | 0.11 - 0.14  | 0.29 | 0.24 - 0.35 |
| Radiotherapy                      | No           | 3,849  | 454 (11.8) | 1.00 | -            | 1.00 | -           |
|                                   | Yes          | 7,335  | 256 (3.5)  | 0.27 | 0.23 - 0.32  | 0.61 | 0.51 - 0.74 |
|                                   | Not known    | 3,853  | 270 (7.0)  | 0.56 | 0.48 - 0.66  | 0.65 | 0.48 - 0.87 |
| Chemotherapy                      | No           | 7,002  | 520 (7.4)  | 1.00 | -            | 1.00 | -           |
|                                   | Yes          | 4,403  | 203 (4.6)  | 0.60 | 0.51 - 0.71  | 1.49 | 1.19 - 1.86 |
|                                   | Not known    | 3,632  | 257 (7.1)  | 0.95 | 0.81 - 1.11  | 1.20 | 0.89 - 1.62 |
| Tamoxifen                         | No           | 2,493  | 172 (6.9)  | 1.00 | -            | 1.00 | -           |
|                                   | Yes          | 9,231  | 601 (6.5)  | 0.94 | 0.79 - 1.12  | 0.64 | 0.51 - 0.80 |
|                                   | Not known    | 3,313  | 207 (6.2)  | 0.90 | 0.73 - 1.11  | 0.93 | 0.70 - 1.24 |
| Charlson Index<br>(comorbidities) | 0 (minor)    | 6,958  | 203 (2.9)  | 1.00 | -            | 1.00 | -           |
|                                   | 1 (moderate) | 407    | 48 (11.8)  | 4.45 | 3.19 - 6.20  | 2.54 | 1.77 - 3.65 |
|                                   | 2+ (severe)  | 1,615  | 231 (14.3) | 5.55 | 4.56 - 6.76  | 3.55 | 2.85 - 4.42 |
|                                   | Not known    | 6,057  | 498 (8.2)  | 2.98 | 2.52 - 3.52  | 1.10 | 0.90 - 1.34 |
| Cancer Plan<br>(diagnosis date)   | pre 2000     | 9,681  | 624 (6.4)  | 1.00 | -            | 1.00 | -           |
|                                   | 2000 - 2003  | 4,189  | 292 (7.0)  | 1.09 | 0.94 - 1.26  | 0.90 | 0.75 - 1.07 |
|                                   | post 2003    | 1,167  | 64 (5.5)   | 0.84 | 0.65 - 1.10  | 0.71 | 0.52 - 0.98 |

Table 4: Characteristics of women who did or did not have surgery

| Patient characteristics         | Surgery          |                   | P-value*          |
|---------------------------------|------------------|-------------------|-------------------|
|                                 | No<br>Number (%) | Yes<br>Number (%) |                   |
| Age at diagnosis (years)        |                  |                   |                   |
| <50                             | 213 (10.6)       | 3,587 (27.5)      |                   |
| 50-59                           | 182 (9.1)        | 3,557 (27.3)      |                   |
| 60-69                           | 219 (10.9)       | 2,823 (21.7)      |                   |
| 70-79                           | 526 (26.3)       | 2,117 (16.2)      |                   |
| >80                             | 862 (43.1)       | 951 (7.3)         | < 0.001           |
| Ethnicity                       |                  |                   |                   |
| Non-white                       | 238 (11.9)       | 1,820 (14.0)      |                   |
| White                           | 989 (49.4)       | 8,109 (62.2)      |                   |
| Not known                       | 775 (38.7)       | 3,106 (23.8)      | 0.36 <sup>a</sup> |
| Presentation                    |                  |                   |                   |
| Screening                       | 61 (3.0)         | 2,236 (17.2)      |                   |
| Symptoms                        | 1,527 (76.3)     | 8,767 (67.3)      |                   |
| Incidental                      | 117 (5.8)        | 475 (3.6)         |                   |
| Not known                       | 297 (14.8)       | 1,557 (11.9)      | < 0.001           |
| Distant metastases at diagnosis |                  |                   |                   |
| No                              | 680 (34.0)       | 7,609 (58.4)      |                   |
| Yes                             | 151 (7.5)        | 276 (2.1)         |                   |
| Not known                       | 1,171 (58.5)     | 5,150 (39.5)      | < 0.001           |
| Radiotherapy                    |                  |                   |                   |
| No                              | 1,014 (50.6)     | 2,835 (21.7)      |                   |
| Yes                             | 339 (16.9)       | 6,996 (53.7)      |                   |
| Not known                       | 649 (32.4)       | 3,204 (24.6)      | < 0.001           |
| Chemotherapy                    |                  |                   |                   |
| No                              | 1,107 (55.3)     | 5,895 (45.2)      |                   |
| Yes                             | 311 (15.5)       | 4,092 (31.3)      |                   |
| Not known                       | 584 (29.2)       | 3,048 (23.4)      | < 0.001           |
| Tamoxifen                       |                  |                   |                   |
| No                              | 260 (13.0)       | 2,233 (17.1)      |                   |
| Yes                             | 1,315 (65.7)     | 7,916 (60.7)      |                   |
| Not known                       | 427 (21.3)       | 2,886 (22.1)      | < 0.001           |
| Charlson index (comorbidities)  |                  |                   |                   |
| 0                               | 309 (15.4)       | 6,649 (51.0)      |                   |
| 1                               | 47 (2.3)         | 360 (2.8)         |                   |
| ≥ 2                             | 181 (9.0)        | 1,434 (11.0)      |                   |
| Not known                       | 1,465 (73.2)     | 4,592 (35.2)      | < 0.001           |
| Cancer plan (diagnosis date)    |                  |                   |                   |
| pre 2000                        | 1336 (66.7)      | 8345 (64.0)       |                   |
| 2000 to 2003                    | 522 (26.1)       | 3667 (28.1)       |                   |
| post 2003                       | 144 (7.2)        | 1023 (7.8)        | 0.025             |
| Total cases                     | 2,002            | 13,035            |                   |

\* P-value for comparison of proportions, excluding 'not known' category where present. For age, Charlson index and cancer plan test is for trend; for all other factors test is for heterogeneity.

<sup>a</sup> P-value when 'not known' category is included: < 0.001

1  
2  
3  
4  
5  
6  
7  
8  
9  
10  
11  
12  
13  
14  
15  
16  
17  
18  
19  
20  
21  
22  
23  
24  
25  
26  
27  
28  
29  
30  
31  
32  
33  
34  
35  
36  
37  
38  
39  
40  
41  
42  
43  
44  
45  
46  
47

Table 5: Crude and adjusted odds ratios and 95% confidence intervals for surgical treatment

| Factor                          | Number of cases | Surgical cases<br>Number (%) | Odds Ratios  |                     |             |                     |             |
|---------------------------------|-----------------|------------------------------|--------------|---------------------|-------------|---------------------|-------------|
|                                 |                 |                              | Unadjusted   |                     | Adjusted    |                     |             |
|                                 |                 |                              | Odds Ratio   | Confidence Interval | Odds Ratio  | Confidence Interval |             |
| Age at diagnosis (years)        | < 50            | 3,800                        | 3,587 (94.4) | 1.00                | -           | 1.00                | -           |
|                                 | 50 - 59         | 3,739                        | 3,557 (95.1) | 1.16                | 0.95 - 1.42 | 0.99                | 0.80 - 1.22 |
|                                 | 60 - 69         | 3,042                        | 2,823 (92.8) | 0.77                | 0.63 - 0.93 | 0.73                | 0.59 - 0.89 |
|                                 | 70 - 79         | 2,643                        | 2,117 (80.1) | 0.24                | 0.20 - 0.28 | 0.27                | 0.23 - 0.33 |
|                                 | 80 +            | 1,813                        | 951 (52.5)   | 0.07                | 0.06 - 0.08 | 0.09                | 0.07 - 0.10 |
| Ethnicity                       | Non-white       | 2,058                        | 1,820 (88.4) | 1.00                | -           | 1.00                | -           |
|                                 | White           | 9,098                        | 8,109 (89.1) | 1.07                | 0.92 - 1.25 | 1.39                | 1.16 - 1.65 |
|                                 | Not known       | 3,881                        | 3,106 (80.0) | 0.52                | 0.45 - 0.61 | 0.93                | 0.77 - 1.11 |
| Presentation                    | Screening       | 2,297                        | 2,236 (97.3) | 1.00                | -           | 1.00                | -           |
|                                 | Symptoms        | 10,294                       | 8,767 (85.2) | 0.16                | 0.12 - 0.20 | 0.34                | 0.26 - 0.45 |
|                                 | Incidental      | 592                          | 475 (80.2)   | 0.11                | 0.08 - 0.15 | 0.28                | 0.20 - 0.40 |
|                                 | Not known       | 1,854                        | 1,557 (84.0) | 0.14                | 0.11 - 0.19 | 0.39                | 0.29 - 0.53 |
| Distant metastases at diagnosis | No              | 8,289                        | 7,609 (91.8) | 1.00                | -           | 1.00                | -           |
|                                 | Yes             | 427                          | 276 (64.6)   | 0.16                | 0.13 - 0.20 | 0.16                | 0.12 - 0.20 |
|                                 | Not known       | 6,321                        | 5150 (81.5)  | 0.39                | 0.36 - 0.43 | 0.36                | 0.31 - 0.40 |
| Charlson Index (comorbidities)  | 0 (minor)       | 6,958                        | 6,649 (95.6) | 1.00                | -           | 1.00                | -           |
|                                 | 1 (moderate)    | 407                          | 360 (88.5)   | 0.36                | 0.26 - 0.49 | 0.70                | 0.49 - 0.99 |
|                                 | 2+ (severe)     | 1,615                        | 1,434 (88.8) | 0.37                | 0.30 - 0.45 | 0.50                | 0.41 - 0.62 |
|                                 | Not known       | 6,057                        | 4,592 (75.8) | 0.15                | 0.13 - 0.17 | 0.20                | 0.17 - 0.23 |
| Cancer Plan (diagnosis date)    | pre 2000        | 9,681                        | 8,345 (86.2) | 1.00                | -           | 1.00                | -           |
|                                 | 2000 - 2003     | 4,189                        | 3,667 (87.5) | 1.12                | 1.01 - 1.25 | 1.11                | 0.97 - 1.27 |
|                                 | post 2003       | 1,167                        | 1,023 (87.7) | 1.14                | 0.95 - 1.37 | 0.75                | 0.60 - 0.94 |

### Contributorship Statement

DR, LH and CS designed the study. DR, DT and CS collated and analysed the data. CS wrote the first draft and DR, HM and LH finalised the manuscript. All authors contributed to the interpretation of the data, and reviewed and revised the manuscript, and have read and approved the final draft. All authors had full access to all of the data (including statistical reports and tables) in the study and can take responsibility for the integrity of the data and the accuracy of the data analysis.

### Funding

This research received no specific grant from any funding agency in the public, commercial or not-for-profit sectors

### Acknowledgements

The Thames Cancer Registry in King's College London receives funding from the Department of Health for England. The views expressed in the article are those of the authors and not necessarily those of the Department of Health.

### Data sharing

No additional data available.

## References

- 1
- 2
- 3
- 4
- 5
- 6 (1) Berrino F, Verdecchia A, Lutz JM, Lombardo C, Micheli A, Capocaccia R. Comparative cancer survival
- 7 information in Europe. *Eur J Cancer* 2009; 45(6): 901-08.
- 8
- 9 (2) Verdecchia A, Francisci S, Brenner H, Gatta G, Micheli A, Mangone L et al. Recent cancer survival in
- 10 Europe: a 2000-02 period analysis of EURO CARE-4 data. *Lancet Oncol* 2007; 8(9): 784-96.
- 11
- 12 (3) Beral V, Peto R. UK cancer survival statistics. *BMJ* 2010; 341: c4112.
- 13
- 14 (4) Møller H, Richards S, Hanchett N, Riaz SP, Lüchtenborg M, Holmberg L, Robinson D. Completeness of
- 15 case ascertainment and survival time error in English cancer registries: impact on one-year survival
- 16 estimates. *Br J Cancer* 2011 (In press).
- 17
- 18 (5) Robinson D, Sankila R, Hakulinen T, Moller H. Interpreting international comparisons of cancer survival:
- 19 the effects of incomplete registration and the presence of death certificate only cases on survival
- 20 estimates. *Eur J Cancer* 2007; 43(5): 909-13.
- 21
- 22 (6) Sant M, Capocaccia R, Verdecchia A, Esteve J, Gatta G, Micheli A et al. Survival of women with breast
- 23 cancer in Europe: variation with age, year of diagnosis and country. The EURO CARE Working Group.
- 24 *Int J Cancer* 1998; 77(5): 679-83.
- 25
- 26 (7) Møller H, Sandin F, Bray F, Klint A, Linklater KM, Purushotham A et al. Breast cancer survival in
- 27 England, Norway and Sweden: a population-based comparison. *Int J Cancer* 2010; 127(11): 2630-38.
- 28
- 29 (8) Rachet B, Maringe C, Nur U, Quaresma M, Shah A, Woods LM et al. Population-based cancer survival
- 30 trends in England and Wales up to 2007: an assessment of the NHS cancer plan for England. *Lancet*
- 31 *Oncol* 2009; 10(4): 351-69.
- 32
- 33 (9) Charlson ME, Pompei P, Ales KL, MacKenzie CR. A new method of classifying prognostic comorbidity
- 34 in longitudinal studies: development and validation. *J Chronic Dis* 1987; 40(5): 373-83.
- 35
- 36 (10) Brewster DH, Clark DI, Stockton DL, Munro AJ, Steele RJ. Characteristics of patients dying within 30
- 37 days of diagnosis of breast or colorectal cancer in Scotland, 2003-2007. *Br J Cancer* 2011; 104(1): 60-7.
- 38
- 39 (11) Janssen-Heijnen ML, Maas HA, Houterman S, Lemmens VE, Rutten HJ, Coebergh JW. Comorbidity in
- 40 older surgical cancer patients: influence on patient care and outcome. *Eur J Cancer* 2007; 43(15): 2179-
- 41 93.
- 42
- 43 (12) Lavelle K, Moran A, Howell A, Bundred N, Campbell M, Todd C. Older women with operable breast
- 44 cancer are less likely to have surgery. *Br J Surg* 2007; 94(10): 1209-15.
- 45
- 46 (13) Haggstrom DA, Quale C, Smith-Bindman R. Differences in the quality of breast cancer care among
- 47 vulnerable populations. *Cancer* 2005; 104(11): 2347-58.
- 48
- 49 (14) Ugnat AM, Xie L, Morriss J, Semenciw R, Mao Y. Survival of women with breast cancer in Ottawa,
- 50 Canada: variation with age, stage, histology, grade and treatment. *Br J Cancer* 2004; 90(6): 1138-43.
- 51
- 52 (15) Bouchardy C, Rapiti E, Fioretta G, Laissue P, Neyroud-Caspar I, Schafer P et al. Undertreatment
- 53 strongly decreases prognosis of breast cancer in elderly women. *J Clin Oncol* 2003; 21(19): 3580-87.
- 54
- 55 (16) Yancik R, Wesley MN, Ries LA, Havlik RJ, Edwards BK, Yates JW. Effect of age and comorbidity in
- 56 postmenopausal breast cancer patients aged 55 years and older. *JAMA* 2001; 285(7): 885-92.
- 57
- 58 (17) Busch E, Kemeny M, Fremgen A, Osteen RT, Winchester DP, Clive RE. Patterns of breast cancer care
- 59 in the elderly. *Cancer* 1996; 78(1): 101-11.
- 60

- 1  
2  
3  
4  
5  
6  
7  
8  
9  
10  
11  
12  
13  
14  
15  
16  
17  
18  
19  
20  
21  
22  
23  
24  
25  
26  
27  
28  
29  
30  
31  
32  
33  
34  
35  
36  
37  
38  
39  
40  
41  
42  
43  
44  
45  
46  
47  
48  
49  
50  
51  
52  
53  
54  
55  
56  
57  
58  
59  
60
- (18) Ballard-Barbash R, Potosky AL, Harlan LC, Nayfield SG, Kessler LG. Factors associated with surgical and radiation therapy for early stage breast cancer in older women. *J Natl Cancer Inst* 1996; 88(11): 716-26.
  - (19) Eaker S, Dickman PW, Bergkvist L, Holmberg L. Differences in management of older women influence breast cancer survival: results from a population-based database in Sweden. *PLoS Med* 2006; 3(3): e25.
  - (20) Sant M, Allemani C, Capocaccia R, Hakulinen T, Aareleid T, Coebergh JW et al. Stage at diagnosis is a key explanation of differences in breast cancer survival across Europe. *Int J Cancer* 2003; 106(3): 416-22.
  - (21) Soerjomataram I, Louwman MW, Ribot JG, Roukema JA, Coebergh JW. An overview of prognostic factors for long-term survivors of breast cancer. *Breast Cancer Res Treat* 2008; 107(3): 309-30.
  - (22) Carter CL, Allen C, Henson DE. Relation of tumor size, lymph node status, and survival in 24,740 breast cancer cases. *Cancer* 1989; 63(1):181-7.
  - (23) Cronin-Fenton DP, Norgaard M, Jacobsen J, Garne JP, Ewertz M, Lash TL et al. Comorbidity and survival of Danish breast cancer patients from 1995 to 2005. *Br J Cancer* 2007; 96(9):1462-8.
  - (24) National Cancer Intelligence Network. The Second All Breast Cancer Report. NCIN: June 2011. [www.ncin.org.uk/home.aspx](http://www.ncin.org.uk/home.aspx) (accessed 19 June 2011).
  - (25) Lavelle K, Todd C, Moran A, Howell A, Bundred N, Campbell M. Non-standard management of breast cancer increases with age in the UK: a population based cohort of women 65 years. *Br J Cancer* 2007; 96: 1197-1203.
  - (26) Office for National Statistics. Breast Cancer: Incidence rates rise, mortality rates fall. October 2010. [www.statistics.gov.uk/cci/nugget.asp?id=575](http://www.statistics.gov.uk/cci/nugget.asp?id=575) (accessed 19 June 2011).
  - (27) Hoy AR, Patrick H, Campbell B, Lyratzopoulos G. Measuring the influence of colleagues on a consultant team's use of breast conserving surgery. *Int J Technol Assess Health Care* 2010; 26(2): 156-162.
  - (28) Tataru D, Robinson D, Moller H, Davies E. Trends in the treatment of breast cancer in Southeast England following the introduction of national guidelines. *J Public Health (Oxf)* 2006; 28(3): 215-7.
  - (29) Macleod U, Ross S, Gillis C, McConnachie A, Twelves C, Watt GC. Socio-economic deprivation and stage of disease at presentation in women with breast cancer. *Ann Oncol* 2000; 11(1): 105-7.
  - (30) Macleod U, Ross S, Twelves C, George WD, Gillis C, Watt GC. Primary and secondary care management of women with early breast cancer from affluent and deprived areas: retrospective review of hospital and general practice records. *BMJ* 2000; 320(7247): 1442-5.
  - (31) Downing A, Prakash K, Gilthorpe MS, Mikeljevic JS, Forman D. Socioeconomic background in relation to stage at diagnosis, treatment and survival in women with breast cancer. *Br J Cancer* 2007; 96(5): 836-40.
  - (32) Department of Health. The NHS Cancer plan: a plan for investment, a plan for reform. 2000. London, Department of Health.
  - (33) House of Commons. The NHS Cancer Plan: a progress report. 2005. London, The Stationery Office.
  - (34) Department of Health. Cancer Reform Strategy. 2007. London, Department of Health.



**Predictors of early death in female breast cancer patients in the UK: a cohort study.**

|                                 |                                                                                                                                                                                                                                                                                                                                         |
|---------------------------------|-----------------------------------------------------------------------------------------------------------------------------------------------------------------------------------------------------------------------------------------------------------------------------------------------------------------------------------------|
| Journal:                        | <i>BMJ Open</i>                                                                                                                                                                                                                                                                                                                         |
| Manuscript ID:                  | bmjopen-2011-000247.R1                                                                                                                                                                                                                                                                                                                  |
| Article Type:                   | Research                                                                                                                                                                                                                                                                                                                                |
| Date Submitted by the Author:   | 05-Aug-2011                                                                                                                                                                                                                                                                                                                             |
| Complete List of Authors:       | Stapelkamp, Ceilidh; Kings College London, Thames Cancer Registry<br>Holmberg, Lars; Kings College London, Division of Cancer Studies<br>Tataru, Daniela; Kings College London, Thames Cancer Registry<br>Moller, Henrik; Kings College London, Thames Cancer Registry<br>Robinson, David; Kings College London, Thames Cancer Registry |
| <b>Primary Subject Heading</b>: | Oncology                                                                                                                                                                                                                                                                                                                                |
| Keywords:                       | Breast tumours < ONCOLOGY, Organisation of health services < HEALTH SERVICES ADMINISTRATION & MANAGEMENT, ONCOLOGY                                                                                                                                                                                                                      |
|                                 |                                                                                                                                                                                                                                                                                                                                         |

SCHOLARONE™  
Manuscripts

only



1  
2  
3 **Title page**  
4

5 **Predictors of early death in female breast cancer patients in the UK: a cohort study.**  
6

7 *Ceilidh Stapelkamp, Lars Holmberg, Daniela Tataru, Henrik Møller, David Robinson*  
8

9  
10 Ceilidh Stapelkamp  
11 Research Analyst  
12 King's College London, Thames Cancer Registry  
13 Capital House  
14 42 Weston Street  
15 London SE1 3QD  
16

17 Lars Holmberg  
18 Professor of Cancer Epidemiology  
19 Division of Cancer Studies, Cancer Epidemiology Group  
20 Research Oncology  
21 3rd Floor, Bermondsey Wing  
22 Guy's Hospital  
23 London SE1 9RT  
24

25 Daniela Tataru  
26 Information Analyst  
27 King's College London, Thames Cancer Registry  
28 Capital House  
29 42 Weston Street  
30 London SE1 3QD  
31

32 Henrik Møller  
33 Director Thames Cancer Registry  
34 King's College London, Thames Cancer Registry  
35 Capital House  
36 42 Weston Street  
37 London SE1 3QD  
38

39 David Robinson  
40 Honorary Senior Lecturer  
41 King's College London, Thames Cancer Registry  
42 Capital House  
43 42 Weston Street  
44 London SE1 3QD  
45

46 Corresponding author

47 Lars Holmberg  
48 Professor of Cancer Epidemiology  
49 Division of Cancer Studies, Cancer Epidemiology Group  
50 Research Oncology  
51 3rd Floor, Bermondsey Wing  
52 Guy's Hospital  
53 London SE1 9RT  
54 Email: [lars.holmberg@kcl.ac.uk](mailto:lars.holmberg@kcl.ac.uk)  
55  
56  
57  
58  
59  
60

## Abstract

**Objectives:** To identify factors predicting early death in women with breast cancer. **Design:** Cohort study. **Setting:** 29 trusts across seven cancer networks in the North Thames area. **Participants:** 15,037 women with primary breast cancer diagnosed between January 1996 and December 2005. **Methods:** Logistic regression analyses to determine predictors of early death and factors associated with lack of surgical treatment. **Main exposures:** Age at diagnosis, mode of presentation, ethnicity, disease severity, comorbidities, treatment and period of diagnosis in relation to the Cancer Plan. **Main outcome measures:** Death from any cause within one year of diagnosis, and receipt of surgical treatment. **Results:** By 31<sup>st</sup> December 2006 4,765 women had died, 980 in the year after diagnosis. Older age and disease severity independently predicted early death. Women over 80 were more likely to die early than women under 50 (OR 8.05, 95% CI 5.96 to 10.88). Presence of distant metastases on diagnosis increased the odds of early death more than eight-fold (OR 8.41, 95% CI 6.49 to 10.89). Two or more recorded comorbidities were associated with a nearly four-fold increase. There was a significant decrease in odds associated with surgery (OR 0.29, 95% CI 0.24 to 0.35). Independently of disease severity and comorbidities, women over 70 were less likely than those under 50 to be treated surgically and this was even more pronounced in those aged over 80 (OR 0.09, 95% CI 0.07 to 0.10). Other factors independently associated with a reduced likelihood of surgery included a non-screening presentation, non-white ethnicity and additional comorbidities. **Conclusions:** These findings may partially explain the survival discrepancies between the UK and other European countries in female breast cancer patients. The study identifies a group of women with a particularly poor prognosis for whom interventions aiming at early detection may be targeted.

**ARTICLE FOCUS**

- Several studies have shown that the UK has lower survival for breast cancer than some other European countries with a similar expenditure on health care.
- Differences have been shown to occur mainly in older patients and in the first year after diagnosis.
- Several reasons/explanations have been proposed.

**KEY MESSAGES**

- This study shows that breast cancer patients dying in the first year after diagnosis are more likely to be older, have more advanced disease and existing comorbidities.
- Surgical treatment and (to a lesser extent) radiotherapy and tamoxifen usage were associated with a reduced risk of early death.
- The likelihood of receiving surgery was inversely related to age, independently of comorbidity and disease severity.
- These findings suggest that early detection, management of comorbidities and optimization of treatment of older patients are important target areas to improve outcomes.

**STRENGTHS AND LIMITATIONS**

- This is a large cohort of women diagnosed with breast cancer and the results may be generalisable to women treated for breast cancer in the UK during the same time period.
- Many variables that may be related to both risk factors and outcomes have not been assessed in this study. However, their correlation with death within a year would have to be very strong to explain the strong associations seen in our data.

## Introduction

Despite the decline in breast cancer mortality rates seen in the UK since the late 1980s, survival rates are still substantially lower than in many other European countries.<sup>1,2</sup> It has been difficult to pinpoint the reasons for these differences. One important observation in some studies remains unexplained, namely that of poorer survival in UK patients soon after their diagnosis. Sant et al<sup>3</sup> demonstrated a higher risk of death in women with breast cancer in the UK in the first six months after diagnosis than in other European countries. This was particularly pronounced for the youngest (under 29 years) and oldest (over 80 years) age groups. Six months from diagnosis, survival patterns in the UK became more similar to those in the other European countries. Further analysis of the survival differential has revealed that disparities between the UK and northern European countries (Sweden and Norway) occur mainly for older women in the first year after diagnosis.<sup>4</sup> Eighty-one percent of the excess UK deaths occur within two years of diagnosis.

Beral and Peto<sup>5</sup> have suggested that observed differences in survival may be due to bias relating to artefacts in cancer registration rather than to genuine differences in diagnosis and management of breast cancer. However, a recent study by Møller et al<sup>6</sup> has shown that such effects are unlikely to make a significant contribution to observed differences in survival. The effects of incomplete ascertainment and registration from death certificates only on survival comparisons based on cancer registry data have been investigated in detail by Robinson et al.<sup>7</sup>

The aim of this study was to investigate factors associated with early mortality (within one year following diagnosis) in a sample of UK women diagnosed with breast cancer during 1996-2005. Since surgical intervention with a curative intent is strongly related to reduced mortality, a secondary aim of the study was to identify the patient characteristics most often associated with the failure to use this treatment option.

## Subjects and methods

We conducted a cohort study using data from the North Thames Prospective Audit of Breast Cancer, set up in 1996 by Health Authorities in the North Thames area to monitor the implementation of the Calman-Hine recommendations in 29 trusts in seven participating cancer networks: North London, North East London, West London, South West London (Royal Marsden Hospital, Brompton Road), Mount Vernon, Mid-Anglia and South Essex. The audit used a common dataset and a standard proforma across the providers to collect detailed demographic, diagnostic and treatment data for all new primary cases of malignant female breast cancer diagnosed between January 1996 and December 2005. Trained data collectors used either Thames Cancer Registry (TCR) Access-based software or the British Association of Surgical Oncology (BASO) software for breast audit to record information. The number of participating trusts varied from year to year, with a maximum of 26 trusts submitting partial or complete datasets in 2000 and a minimum of seven trusts submitting data in 2005.

1  
2  
3 Women were followed from their date of entry into the audit to death or censoring at 31<sup>st</sup> December  
4 2006, an average of 5.6 years. Date of death was confirmed through linking patients to the NHS  
5 Central Register using the NHS Strategic Tracing Service (NSTS) or matching with records in the  
6 Thames Cancer Registry (TCR). For those who were neither traced nor matched, date of death was  
7 taken from the breast audit database, if it was recorded. Women who were either traced or matched  
8 but who had no date of death in any of the three databases were assumed to be alive at 31<sup>st</sup>  
9 December 2006. Women who could not be traced in the NHS Central Register or matched to the TCR  
10 database and who had no date of death recorded in the audit database were excluded from analyses,  
11 as we could not be sure of their vital status. The study also excluded women with *in situ* breast cancer  
12 without any invasive component at diagnosis. After these exclusions, a total of 15,037 women were  
13 available for analysis.  
14  
15  
16  
17  
18  
19  
20

21  
22 Data on different treatment modes (surgery, radiotherapy, chemotherapy and tamoxifen) were taken  
23 from the Audit database, augmented by information from the TCR database where possible. Cases  
24 were matched to Hospital Episode Statistics (HES) data using name, NHS number, date of birth, and  
25 date of diagnosis within 90 days of that recorded in the audit database in order to obtain further  
26 information on receipt of surgery. Women with a C50 diagnosis (breast cancer) and a B or T8 code in  
27 the HES surgery field were regarded as having had surgery. Only 98 cases were re-coded on this  
28 basis, illustrating the completeness of the audit database in this respect.  
29  
30  
31  
32  
33

34 Cause of death was available from the TCR database for 85% of the women who died during the  
35 study period. A categorical variable accounting for calendar period of diagnosis was included to adjust  
36 for diagnosis and treatment in relation to the implementation of the Cancer Plan. As per the  
37 methodology of Rachet et al<sup>8</sup>, the following periods were considered: before 27/09/2000 (when the  
38 plan was published); 28/09/2000-31/12/2003 (initialization period); after 01/01/2004 (implementation).  
39 Patient age was categorized as: <50 years, 50 to 59 years, 60 to 69 years, 70 to 79 years and 80  
40 years and over. Pathological tumour size was assigned to one of five groups: <10mm, 10 to 19mm,  
41 20 to 39mm, 40 to 49mm and 50mm and over. Information on additional diagnoses was obtained from  
42 the matched HES dataset and was used to determine the Charlson Comorbidity Index for matched  
43 patients. This is a weighted index based on the number and severity of 17 potential serious comorbid  
44 conditions that affect mortality.<sup>9</sup> The index was categorised into the groups 0, 1 and 2+.  
45  
46  
47  
48  
49  
50  
51

52 Clinical, demographic, pathological and treatment-related factors were compared between women  
53 who died from any cause within one year of their diagnosis and those who survived beyond this year.  
54 All cause mortality, rather than death from breast cancer, was used partly because specific cause of  
55 death was not known in 15% of the women, but also because the international study<sup>4</sup> which  
56 highlighted the adverse survival in English women in the first year post diagnosis was also based on  
57  
58  
59  
60

1  
2  
3 all cause mortality. An analysis restricted to breast cancer-specific mortality produced broadly similar  
4 results.  
5  
6  
7

8 Univariate analyses were performed using  $\chi^2$  tests and unadjusted (bivariate) logistic regression  
9 models. A multivariate logistic regression model investigated the independent contribution of all  
10 covariates. This model included surgery but not collinear covariates, i.e. variables that were only  
11 known for patients who had surgery, namely tumour size and node status.  
12  
13  
14

15  
16 The regression models assessed the effects of age, ethnicity, mode of presentation (screening,  
17 symptoms or incidental), distant metastases at diagnosis, comorbidities, period of diagnosis and  
18 treatments (surgery, radiotherapy, tamoxifen and chemotherapy) on early death from any cause. The  
19 results are presented as odds ratios (ORs), both unadjusted (univariate) and fully adjusted  
20 (multivariate), with 95% confidence intervals (CIs).  
21  
22  
23

24  
25  
26 Additional logistic regression models were used to determine which factors were associated with use  
27 of surgery. All analyses were conducted using STATA 10.  
28  
29  
30

### 31 Results

32 The study population consisted of 15,037 women of whom 4,456 (30%) were over 70 years old at the  
33 time of their diagnosis. The majority of women (78%) presented symptomatically, and 82% of those  
34 with known ethnicity were recorded as white. Over a mean follow up of 5.6 years there were 4,765  
35 deaths. Table 1 shows the underlying cause of death in these women. 980 women (6.5% of the total  
36 cohort and 20.6% of all deaths) died within a year of their diagnosis, and of these 464 women were  
37 known to have died from breast cancer. Amongst those for whom the cause of death was known,  
38 there was no significant difference in the proportions dying from different causes between those who  
39 died within or after the first year since diagnosis ( $\chi^2 = 10.6$ ; 9 df;  $p = 0.30$ ). However, significantly  
40 more of the women who died early had an unrecorded cause of death (26% versus 12%).  
41  
42  
43  
44  
45  
46

47 Table 2 describes the characteristics of women who survived one year beyond diagnosis and those  
48 who did not, and Table 3 shows the results of the logistic regression analyses. In univariate analyses  
49 ( $\chi^2$  values in Table 2 and unadjusted odds ratios in Table 3), older age (>60 years), white ethnicity,  
50 distant metastases at diagnosis, positive nodes and larger tumours (>20mm) were all significantly  
51 linked with death within one year of diagnosis ( $p < 0.001$  for all  $\chi^2$  tests). Comorbidities on diagnosis  
52 were also associated with an increased likelihood of early death (Charlson Index  $\geq 2$ : OR 5.55, 95%  
53 CI 4.56 to 6.76). Women presenting because of symptoms (OR 7.91, 95% CI 5.21 to 12.01) or whose  
54 cancer was discovered incidentally (OR 11.98, 95% CI 7.37 to 19.48) were significantly more likely to  
55 die early, compared to those whose cancer was identified through screening. 'Incidental' cancers  
56  
57  
58  
59  
60

1  
2  
3 comprised mainly interval cancers and non-symptomatic referrals from any source other than the  
4 patient's GP.  
5  
6  
7

8 Surgical treatment was associated with highly significantly reduced odds of early death from any  
9 cause (OR 0.12, 95% CI 0.11 to 0.14), as was treatment with chemotherapy (OR 0.60, 95% CI 0.51 to  
10 0.71) and radiotherapy (OR 0.27, 95% CI 0.23 to 0.32). There was no significant association between  
11 tamoxifen usage and early death (OR 0.94, 95% CI 0.79 to 1.12). The time period in which women  
12 were diagnosed (before, during or after implementation of the Cancer Plan) was not significantly  
13 associated with death within a year of diagnosis in univariate models ( $\chi^2 = 3.54$ ;  $p = 0.17$ ).  
14  
15  
16  
17

18 The results of the multivariate logistic regression analysis to assess the factors independently  
19 associated with early death are shown as the adjusted odds ratios in Table 3. This model excluded  
20 tumour size and nodal status, which are only known in women who received surgical treatment. There  
21 was a clear and independent association between increasing age and the risk of early death, with an  
22 eight-fold increase in the odds of early death in women aged 80 or more compared to those aged <  
23 50 at diagnosis (OR: 8.05, 95% CI 5.96 to 10.88). In this adjusted analysis, white ethnicity was not  
24 independently associated with early death. The significant associations noted in the univariate  
25 analyses were upheld (though generally attenuated) in the multivariate model, except for  
26 chemotherapy. Women receiving chemotherapy were more likely than those not treated with  
27 chemotherapy to die within a year of their diagnosis (OR 1.49, 95% CI 1.19 to 1.86). Surgery was  
28 associated with a reduced risk of early death (OR 0.29, 95% CI 0.24 to 0.35), as was radiotherapy  
29 (OR 0.61, 95% CI 0.51 to 0.74) and also tamoxifen (OR 0.64, 95% CI 0.51 to 0.80). Women who were  
30 most recently diagnosed with breast cancer (post-2003) were less likely to die early (OR 0.71, 95% CI  
31 0.52 to 0.98). Women with missing data for ethnicity, presentation or metastases were at increased  
32 risk of early death compared to the reference categories.  
33  
34  
35  
36  
37  
38  
39  
40  
41  
42

43 Overall, 13.3% of women did not have surgery as part of their treatment (Table 2), and this proportion  
44 was significantly greater in women who died within a year of diagnosis (50% vs. 11%). The  
45 characteristics of women who did or did not receive surgical treatment are shown in Table 4. Those  
46 receiving surgery were significantly younger, and were more likely to present via screening, to be free  
47 of metastases at diagnosis and to have fewer comorbidities. For those of known ethnicity, there was  
48 no difference in the proportions receiving surgery between white and non-white women. However, the  
49 proportion of cases with unknown ethnicity was significantly greater in those not receiving surgery  
50 (38.7% versus 23.8%).  
51  
52  
53  
54  
55

56 In multivariate analysis (Table 5), mode of presentation, older age (particularly > 80 years), distant  
57 metastases on presentation and comorbidities were independent predictors of no surgical treatment  
58 (70-79 years old versus < 50 years old: OR 0.27, 95% CI 0.23 to 0.33; > 80 years old versus < 50  
59 years old: OR 0.09, 95% CI 0.07 to 0.10; symptomatic presentation versus screening: OR 0.34, 95%  
60



1  
2  
3  
4  
5  
6  
7  
8  
9  
10  
11  
12  
13  
14  
15  
16  
17  
18  
19  
20  
21  
22  
23  
24  
25  
26  
27  
28  
29  
30  
31  
32  
33  
34  
35  
36  
37  
38  
39  
40  
41  
42  
43  
44  
45  
46  
47  
48  
49  
50  
51  
52  
53  
54  
55  
56  
57  
58  
59  
60

CI 0.26 to 0.45; incidental presentation versus screening: OR 0.28, 95% CI 0.20 to 0.40; distant metastases on diagnosis: OR 0.16, 95% CI 0.12 to 0.20; severe comorbidities: OR 0.50, 95% CI 0.41 to 0.62). White ethnicity was independently linked with an increased likelihood of surgical treatment compared to non-white ethnicity (OR 1.39, 95% CI 1.16 to 1.65).

## Discussion

Poorer prognosis of older women with breast cancer has been attributed variously to treatment received,<sup>10-17</sup> more severe disease on presentation<sup>13;18-21</sup> and to the presence of comorbidities.<sup>10</sup> Stage was identified as the most important factor explaining breast cancer survival discrepancies between European countries for women diagnosed between 1990 and 1992,<sup>19</sup> particularly in older age groups.

This study in more than 15,000 women diagnosed with breast cancer in the North Thames area found that age and disease severity at diagnosis were independent predictors of early death from any cause. In the women analysed here, distant metastases on diagnosis were a strong predictor of early death, increasing the odds of dying within a year of diagnosis more than eight-fold (OR 8.41, 95% CI 6.49 to 10.89). This effect was independent of age and treatment. It was also independent of patient comorbidities, although this should be interpreted with some caution as comorbidity data were available only for the 60% of participants who could be successfully linked to the HES dataset. Surgery was strongly associated with a reduced risk of early death, and older patients were less likely to receive surgery.

Great improvements in cancer services have been made during the past decade. To investigate whether the implementation of the Cancer Plan has had any observable effect on survival, this research included a categorical variable controlling for calendar period of diagnosis in the multivariate analyses. This method was similar to that employed by Rachet et al<sup>8</sup> in their assessment of the NHS Cancer Plan for England. In our study, women diagnosed after 2003 had reduced odds of early death compared to women diagnosed before the Cancer Plan was published (OR 0.71, 95% CI 0.52 to 0.98). This is suggestive of a survival benefit resulting from changes to cancer services after 2000.

While women of white ethnicity were at greater odds of early death in univariate analyses, this association was no longer significant when the model was adjusted for the other covariates. The white women were in general older than the non-white women, and this may explain these findings. However, in the adjusted analysis, white women were more likely to be treated surgically than those belonging to non-white ethnic groups. These results should perhaps be treated with caution, given the large proportion (26%) of cases for which ethnicity was not known.

Radiotherapy and tamoxifen treatments were independently associated with reduced likelihood of early death, while chemotherapy was associated with increased odds of dying within a year of

1  
2  
3 diagnosis (OR 1.49, 95% 1.19 to 1.86). This relationship with chemotherapy is likely to be a reflection  
4 of selection bias, whereby only the most severe cases are given this form of treatment. A similar bias,  
5 but in the opposite direction, may apply to surgery – i.e. with very ill patients selectively not being  
6 operated upon. However, the association between surgery and death within one year remained  
7 apparent in a model correcting for age and co-morbidity. These findings are consistent with those in a  
8 recent study by Brewster et al<sup>22</sup> that found age, deprivation, emergency admission, tumour stage and  
9 grade and absence of treatment were independent factors associated with death within 30 days of  
10 diagnosis.  
11

12  
13  
14  
15  
16 A recent report from the National Cancer Intelligence Network based on data from 2007 confirms a  
17 high proportion of older women in the UK do not receive surgical treatment: 61% of women aged over  
18 80 did not have surgery.<sup>23</sup> This group is likely to have a particularly poor prognosis. Nearly 40% of  
19 women who died early in our study were aged over 80 years and 66% (252/383) of them had not had  
20 surgery.  
21

22  
23  
24  
25  
26 In our study, age was strongly inversely associated with the likelihood of receiving surgery. This  
27 reflects the well described pattern in other studies that older women are less likely to receive  
28 treatment than younger women.<sup>10;24</sup> Women over 80 years old attending breast units in Manchester in  
29 2002, for example, were less likely to have surgery than women aged 65 to 79 years even after  
30 adjusting for poorer general health, including comorbidities.<sup>11</sup>  
31

32  
33  
34  
35 Patient comorbidity has been shown to be a potentially important confounder in studies of treatment  
36 received,<sup>15;25</sup> but our analyses suggest that older women are less likely to receive surgery even after  
37 adjusting for comorbidities. Comorbidity data were missing for approximately 40% of participants.  
38 Patients with missing comorbidity data were less likely to receive surgery although there was no  
39 association between these missing data and early death after adjustment for other factors.  
40

41  
42  
43  
44  
45 One potential limitation of this study is missing information. Women with missing data on ethnicity,  
46 presentation and distant metastases were more likely to die within a year of their diagnosis and were  
47 less likely to receive surgical treatment. They may represent women who were seriously ill at  
48 diagnosis and who were not scheduled for surgery. An analysis of the characteristics of patients with  
49 several missing data elements suggests that these women tend to be older, have more severe  
50 disease (as determined by a proxy of tumour size) and are more likely to die early. Additionally, a  
51 failure to record important details relating to their diagnosis and treatment may be an indication that  
52 such patients are receiving worse care. With respect to this study, if women with missing information  
53 have worse disease and are generally older, then the estimates of association between these  
54 variables and early death will be biased towards underestimates of the true effects.  
55  
56  
57  
58  
59  
60

1  
2  
3 Retrospective analyses rely on records in which some information may be inaccurate. In this study a  
4 particular effort was made to ensure that the surgical status of women was recorded correctly as this  
5 was considered an important marker of the quality of treatment and was expected to be strongly  
6 associated with outcome. Time and resource constraints precluded this additional effort being  
7 extended to other variables to verify database entries. However, an earlier study looking at trends in  
8 the treatment of breast cancer,<sup>26</sup> concluded that the audit database was a reasonably reliable source  
9 of such data.  
10  
11  
12  
13

14  
15  
16 The effects of deprivation on disease severity and ultimately on mortality were not explored in this  
17 study. Such analyses rely on potential patient identifiers such as postcode data that were not  
18 available to us. Deprivation has been linked to poorer patient outcomes for UK breast cancer patients  
19 in several studies<sup>22,27-29</sup> and stated aims of the Cancer Plan and the Cancer Reform Strategy<sup>30-32</sup> are  
20 to tackle the inequalities in cancer survival between different socioeconomic groups in England.  
21  
22  
23

24  
25 We suspect a complex relationship between the exposures studied here, some of which may be on  
26 the same causal pathway for early death. For example, high age and comorbidity may be rational and  
27 adequate reasons for not offering surgery. While a number of patient and treatment characteristics  
28 were strongly and independently linked with early death, these associations must be interpreted with  
29 caution and with a consideration for unmeasured confounding factors. For instance, the selection of a  
30 patient's treatment will depend on a number of factors, including some not measured here such as  
31 their own preferences or established practices within the organisation in which they are treated.<sup>33</sup>  
32 Furthermore, their presentation to health services depends, among other factors, on access to  
33 treatment and knowledge of cancer symptoms. Many of these variables may be linked to both risk  
34 factors and outcomes and they have not been assessed in this study. However, for any underlying  
35 confounder to explain the strong statistical associations seen in our data, they would need to have a  
36 very strong correlation with death within a year of diagnosis.  
37  
38  
39  
40  
41  
42  
43  
44

45 Five-year relative survival in our sample (based on life tables for London during the period 1996-2001)  
46 was 84.1%. This is similar to recent estimates from the Office for National Statistics,<sup>34</sup> which reports a  
47 value of 82% for women diagnosed between 2000 and 2006. Thus our cohort sample is likely to be  
48 reasonably representative of the UK population of women diagnosed with breast cancer during this  
49 period. Table 6 compares the audit data to the total registrations for female breast cancer in the North  
50 Thames region at TCR. Mean ages at diagnosis were similar throughout the study period. Likewise,  
51 the proportion of patients dying within one year of diagnosis were broadly similar, though slightly  
52 lower in the audit database (6.5% vs 7.7% overall.) The proportion of total cases represented in the  
53 audit varied between 61% in 1997 and 13% in 2004, with an overall figure of 37%. (The decrease in  
54 the number of registered cases in 2005 is an artefact due to changes in the TCR catchment area.) In  
55  
56  
57  
58  
59  
60

1  
2  
3 general, there was a higher representation in the earlier years, which may have implications for the  
4 applicability of the results to more recent times.  
5  
6  
7

## 8 **Conclusions**

9  
10 Our findings offer detailed insights into the determinants of death in the first year after a diagnosis of  
11 breast cancer, a period shown to be important in international comparisons. As expected, early death  
12 is linked to older age and to the presence of comorbidities. Comorbidities can be addressed in the  
13 long run through general health policy, but two other determinants of early death identified by this  
14 study are potential avenues for intervention.  
15  
16  
17

18 Firstly, the findings relating to disease severity lend empirical support to the notion that late diagnosis  
19 is a major determinant of early death. This supports the rationale for projects that focus on increasing  
20 awareness of breast symptoms and the importance of screening. Secondly, surgery is independently  
21 associated with a large reduction in the risk of early death, and older women were – independently of  
22 disease severity and comorbidity - much less likely to receive surgery. Assuming surgery is an  
23 indicator of attempts at curative treatment, there may be benefits of increased treatment activity for  
24 older women.  
25  
26  
27  
28  
29  
30  
31  
32  
33  
34  
35  
36  
37  
38  
39  
40  
41  
42  
43  
44  
45  
46  
47  
48  
49  
50  
51  
52  
53  
54  
55  
56  
57  
58  
59  
60

**Table 1: Cause of death in women with breast cancer, by length of survival**

| Cause of death                  | Survival               |                        | Total        |
|---------------------------------|------------------------|------------------------|--------------|
|                                 | <1 year from diagnosis | >1 year from diagnosis |              |
|                                 | Number (%)             | Number (%)             | Number (%)   |
| Breast cancer                   | 464 (63.9)             | 2,015 (60.5)           | 2,479 (61.1) |
| Lung cancer                     | 4 (0.6)                | 38 (1.1)               | 42 (1.0)     |
| Colorectal cancer               | 3 (0.4)                | 32 (1.0)               | 35 (0.9)     |
| Other/Unspecified cancer        | 39 (5.4)               | 232 (7.0)              | 271 (6.7)    |
| Ischaemic Heart Disease         | 34 (4.7)               | 137 (4.1)              | 171 (4.2)    |
| Stroke                          | 14 (1.9)               | 79 (2.4)               | 93 (2.3)     |
| Other Cardiovascular Disease    | 43 (5.9)               | 204 (6.1)              | 247 (6.1)    |
| Senility                        | 16 (2.2)               | 92 (2.8)               | 108 (2.7)    |
| Pneumonia                       | 38 (5.2)               | 205 (6.2)              | 243 (6.0)    |
| All other causes                | 71 (9.8)               | 294 (8.8)              | 365 (9.0)    |
| Total with known cause of death | 726 (100.0)            | 3328 (100.0)           | 4054 (100.0) |
| Cause of death not known        | 254 (25.9)             | 457 (12.1)             | 711 (14.9)   |
| Total cases                     | 980                    | 3,785                  | 4,765        |

**Table 2: Characteristics of participants who did or did not survive first year after diagnosis**

| Patient characteristics                        | Survival                             |                                      | P-value*      |         |
|------------------------------------------------|--------------------------------------|--------------------------------------|---------------|---------|
|                                                | <1 year from diagnosis<br>Number (%) | >1 year from diagnosis<br>Number (%) |               |         |
| Age at diagnosis (years)                       |                                      |                                      |               |         |
|                                                | <50                                  | 88 (9.0)                             | 3,712 (26.4)  | < 0.001 |
|                                                | 50-59                                | 91 (9.3)                             | 3,648 (26.0)  |         |
|                                                | 60-69                                | 148 (15.1)                           | 2,894 (20.6)  |         |
|                                                | 70-79                                | 270 (27.6)                           | 2,373 (16.9)  |         |
|                                                | >80                                  | 383 (39.1)                           | 1,430 (10.2)  |         |
| Ethnicity                                      |                                      |                                      |               |         |
|                                                | Non-white                            | 75 (7.7)                             | 1,983 (14.1)  | < 0.001 |
|                                                | White                                | 488 (49.8)                           | 8,610 (61.3)  |         |
|                                                | Not known                            | 417 (42.6)                           | 3,464 (24.6)  |         |
| Distant metastases at diagnosis                |                                      |                                      |               |         |
|                                                | No                                   | 312 (31.8)                           | 7,977 (56.7)  | < 0.001 |
|                                                | Yes                                  | 156 (15.9)                           | 271 (1.9)     |         |
|                                                | Not known                            | 512 (52.2)                           | 5,809 (41.3)  |         |
| Tumour size (mm)                               |                                      |                                      |               |         |
|                                                | <10                                  | 12 (1.2)                             | 1,220 (8.7)   | < 0.001 |
|                                                | 10-19                                | 73 (7.4)                             | 4,016 (28.6)  |         |
|                                                | 20-39                                | 83 (8.5)                             | 3,103 (22.1)  |         |
|                                                | 40-49                                | 86 (8.8)                             | 1,953 (13.9)  |         |
|                                                | ≥50                                  | 99 (10.1)                            | 799 (5.7)     |         |
|                                                | Not known                            | 627 (64.0)                           | 2,966 (21.1)  |         |
| Node status                                    |                                      |                                      |               |         |
|                                                | Negative                             | 95 (9.7)                             | 5,492 (39.1)  | < 0.001 |
|                                                | Positive                             | 167 (17.0)                           | 4,213 (30.0)  |         |
|                                                | Not known                            | 718 (73.3)                           | 4,352 (31.0)  |         |
| Charlson index (comorbidities)                 |                                      |                                      |               |         |
|                                                | 0 (minor)                            | 203 (20.7)                           | 6,755 (48.1)  | < 0.001 |
|                                                | 1 (moderate)                         | 48 (4.9)                             | 359 (2.6)     |         |
|                                                | ≥ 2 (severe)                         | 231 (23.6)                           | 1,384 (9.8)   |         |
|                                                | Not known                            | 498 (50.8)                           | 5,559 (39.5)  |         |
| Diagnosis date<br>(In relation to Cancer Plan) |                                      |                                      |               |         |
|                                                | pre 2000                             | 624 (63.7)                           | 9,057 (64.4)  | 0.79    |
|                                                | 2000 to 2003                         | 292 (29.8)                           | 3,897 (27.7)  |         |
|                                                | post 2003                            | 64 (6.5)                             | 1,103 (7.8)   |         |
| Presentation                                   |                                      |                                      |               |         |
|                                                | Screening                            | 23 (2.3)                             | 2,274 (16.2)  | < 0.001 |
|                                                | Symptoms                             | 763 (77.9)                           | 9,531 (67.8)  |         |
|                                                | Incidental                           | 64 (6.5)                             | 528 (3.8)     |         |
|                                                | Not known                            | 130 (13.3)                           | 1,724 (12.3)  |         |
| Surgery                                        |                                      |                                      |               |         |
|                                                | No                                   | 489 (49.9)                           | 1,513 (10.8)  | < 0.001 |
|                                                | Yes                                  | 491 (50.1)                           | 12,544 (89.2) |         |

|              |           |            |              |         |
|--------------|-----------|------------|--------------|---------|
| Radiotherapy | No        | 454 (46.3) | 3,395 (24.2) | < 0.001 |
|              | Yes       | 256 (26.1) | 7,079 (50.4) |         |
|              | Not known | 270 (27.6) | 3,583 (25.5) |         |
| Chemotherapy | No        | 520 (53.1) | 6,482 (46.1) | < 0.001 |
|              | Yes       | 203 (20.7) | 4,200 (29.9) |         |
|              | Not known | 257 (26.2) | 3,375 (24.0) |         |
| Tamoxifen    | No        | 172 (17.6) | 2,321 (16.5) | 0.49    |
|              | Yes       | 601 (61.3) | 8,630 (61.4) |         |
|              | Not known | 207 (21.1) | 3,106 (22.1) |         |
| Total cases  |           | 980        | 14,057       |         |

\* P-value for comparison of proportions, excluding 'not known' category where present. For age, tumour size, Charlson index and cancer plan test is for trend; for all other factors test is for heterogeneity.

1  
2  
3  
4  
5  
6  
7  
8  
9  
10  
11  
12  
13  
14  
15  
16  
17  
18  
19  
20  
21  
22  
23  
24  
25  
26  
27  
28  
29  
30  
31  
32  
33  
34  
35  
36  
37  
38  
39  
40  
41  
42  
43  
44  
45  
46  
47

**Table 3: Crude and adjusted odds ratios and 95% confidence intervals for early death from any cause**

| Factor                          | Number of cases | Early deaths Number (%) | Odds Ratios |                     |               |                     |              |
|---------------------------------|-----------------|-------------------------|-------------|---------------------|---------------|---------------------|--------------|
|                                 |                 |                         | Unadjusted  |                     | Adjusted *    |                     |              |
|                                 |                 |                         | Odds Ratio  | Confidence Interval | Odds Ratio    | Confidence Interval |              |
| Age at diagnosis (years)        | < 50            | 3,800                   | 88 (2.3)    | 1.00                | -             | 1.00                | -            |
|                                 | 50 - 59         | 3,739                   | 91 (2.4)    | 1.05                | 0.78 - 1.42   | 1.41                | 1.03 - 1.93  |
|                                 | 60 - 69         | 3,042                   | 148 (4.9)   | 2.16                | 1.65 - 2.82   | 2.61                | 1.94 - 3.50  |
|                                 | 70 - 79         | 2,643                   | 270 (10.2)  | 4.80                | 3.75 - 6.14   | 4.62                | 3.45 - 6.18  |
|                                 | 80 +            | 1,813                   | 383 (21.1)  | 11.30               | 8.89 - 14.36  | 8.05                | 5.96 - 10.88 |
| Ethnicity                       | Non-white       | 2,058                   | 75 (3.6)    | 1.00                | -             | 1.00                | -            |
|                                 | White           | 9,098                   | 488 (5.4)   | 1.50                | 1.17 - 1.92   | 1.25                | 0.96 - 1.63  |
|                                 | Not known       | 3,881                   | 417 (10.7)  | 3.18                | 2.47 - 4.09   | 2.24                | 1.70 - 2.94  |
| Distant metastases at diagnosis | No              | 8,289                   | 312 (3.8)   | 1.00                | -             | 1.00                | -            |
|                                 | Yes             | 427                     | 156 (36.5)  | 14.72               | 11.73 - 18.47 | 8.41                | 6.49 - 10.89 |
|                                 | Not known       | 6,321                   | 512 (8.1)   | 2.25                | 1.95 - 2.60   | 1.35                | 1.13 - 1.60  |
| Tumour size (mm)                | < 10            | 1,232                   | 12 (1.0)    | 1.00                | -             | -                   | -            |
|                                 | 10-19           | 4,089                   | 73 (1.8)    | 1.85                | 1.00 - 3.41   | -                   | -            |
|                                 | 20 - 39         | 3,186                   | 83 (2.6)    | 2.72                | 1.48 - 5.00   | -                   | -            |
|                                 | 40 - 49         | 2,039                   | 86 (4.2)    | 4.48                | 2.44 - 8.22   | -                   | -            |
|                                 | 50 +            | 898                     | 99 (11.0)   | 12.60               | 6.87 - 23.08  | -                   | -            |
|                                 | Not known       | 3,593                   | 627 (17.4)  | 21.49               | 12.09 - 38.20 | -                   | -            |
| Node status                     | Negative        | 5,587                   | 95 (1.7)    | 1.00                | -             | -                   | -            |
|                                 | Positive        | 4,380                   | 167 (3.8)   | 2.29                | 1.78 - 2.96   | -                   | -            |
|                                 | Not known       | 5,070                   | 718 (14.2)  | 9.54                | 7.67 - 11.86  | -                   | -            |
| Charlson Index (comorbidities)  | 0 (minor)       | 6,958                   | 203 (2.9)   | 1.00                | -             | 1.00                | -            |
|                                 | 1 (moderate)    | 407                     | 48 (11.8)   | 4.45                | 3.19 - 6.20   | 2.54                | 1.77 - 3.65  |



|                                                   |             |        |            |       |              |      |             |
|---------------------------------------------------|-------------|--------|------------|-------|--------------|------|-------------|
|                                                   | 2+ (severe) | 1,615  | 231 (14.3) | 5.55  | 4.56 - 6.76  | 3.55 | 2.85 - 4.42 |
|                                                   | Not known   | 6,057  | 498 (8.2)  | 2.98  | 2.52 - 3.52  | 1.10 | 0.90 - 1.34 |
| Diagnosis date<br>(In relation to Cancer<br>Plan) | pre 2000    | 9,681  | 624 (6.4)  | 1.00  | -            | 1.00 | -           |
|                                                   | 2000 - 2003 | 4,189  | 292 (7.0)  | 1.09  | 0.94 - 1.26  | 0.90 | 0.75 - 1.07 |
|                                                   | post 2003   | 1,167  | 64 (5.5)   | 0.84  | 0.65 - 1.10  | 0.71 | 0.52 - 0.98 |
| Presentation                                      | Screening   | 2,297  | 23 (1.0)   | 1.00  | -            | 1.00 | -           |
|                                                   | Symptoms    | 10,294 | 763 (7.4)  | 7.91  | 5.21 - 12.01 | 3.31 | 2.13 - 5.14 |
|                                                   | Incidental  | 592    | 64 (10.8)  | 11.98 | 7.37 - 19.48 | 3.92 | 2.30 - 6.66 |
|                                                   | Not known   | 1,854  | 130 (7.0)  | 7.46  | 4.76 - 11.67 | 2.77 | 1.72 - 4.48 |
| Surgery                                           | No          | 2,002  | 489 (24.4) | 1.00  | -            | 1.00 | -           |
|                                                   | Yes         | 13,035 | 491 (3.8)  | 0.12  | 0.11 - 0.14  | 0.29 | 0.24 - 0.35 |
| Radiotherapy                                      | No          | 3,849  | 454 (11.8) | 1.00  | -            | 1.00 | -           |
|                                                   | Yes         | 7,335  | 256 (3.5)  | 0.27  | 0.23 - 0.32  | 0.61 | 0.51 - 0.74 |
|                                                   | Not known   | 3,853  | 270 (7.0)  | 0.56  | 0.48 - 0.66  | 0.65 | 0.48 - 0.87 |
| Chemotherapy                                      | No          | 7,002  | 520 (7.4)  | 1.00  | -            | 1.00 | -           |
|                                                   | Yes         | 4,403  | 203 (4.6)  | 0.60  | 0.51 - 0.71  | 1.49 | 1.19 - 1.86 |
|                                                   | Not known   | 3,632  | 257 (7.1)  | 0.95  | 0.81 - 1.11  | 1.20 | 0.89 - 1.62 |
| Tamoxifen                                         | No          | 2,493  | 172 (6.9)  | 1.00  | -            | 1.00 | -           |
|                                                   | Yes         | 9,231  | 601 (6.5)  | 0.94  | 0.79 - 1.12  | 0.64 | 0.51 - 0.80 |
|                                                   | Not known   | 3,313  | 207 (6.2)  | 0.90  | 0.73 - 1.11  | 0.93 | 0.70 - 1.24 |

\* Adjusted for all other factors, i.e. based on model which includes all factors

Table 4: Characteristics of women who did or did not have surgery

| Patient characteristics                        | Surgery      |              | P-value*          |
|------------------------------------------------|--------------|--------------|-------------------|
|                                                | No           | Yes          |                   |
|                                                | Number (%)   | Number (%)   |                   |
| Age at diagnosis (years)                       |              |              |                   |
| <50                                            | 213 (10.6)   | 3,587 (27.5) |                   |
| 50-59                                          | 182 (9.1)    | 3,557 (27.3) |                   |
| 60-69                                          | 219 (10.9)   | 2,823 (21.7) |                   |
| 70-79                                          | 526 (26.3)   | 2,117 (16.2) |                   |
| >80                                            | 862 (43.1)   | 951 (7.3)    | < 0.001           |
| Ethnicity                                      |              |              |                   |
| Non-white                                      | 238 (11.9)   | 1,820 (14.0) |                   |
| White                                          | 989 (49.4)   | 8,109 (62.2) |                   |
| Not known                                      | 775 (38.7)   | 3,106 (23.8) | 0.36 <sup>a</sup> |
| Distant metastases at diagnosis                |              |              |                   |
| No                                             | 680 (34.0)   | 7,609 (58.4) |                   |
| Yes                                            | 151 (7.5)    | 276 (2.1)    |                   |
| Not known                                      | 1,171 (58.5) | 5,150 (39.5) | < 0.001           |
| Charlson index (comorbidities)                 |              |              |                   |
| 0                                              | 309 (15.4)   | 6,649 (51.0) |                   |
| 1                                              | 47 (2.3)     | 360 (2.8)    |                   |
| ≥ 2                                            | 81 (9.0)     | 1,434 (11.0) |                   |
| Not known                                      | 1,465 (73.2) | 4,592 (35.2) | < 0.001           |
| Diagnosis date<br>(In relation to Cancer Plan) |              |              |                   |
| pre 2000                                       | 1336 (66.7)  | 8345 (64.0)  |                   |
| 2000 to 2003                                   | 522 (26.1)   | 3667 (28.1)  |                   |
| post 2003                                      | 144 (7.2)    | 1023 (7.8)   | 0.025             |
| Presentatio                                    |              |              |                   |
| Screening                                      | 61 (3.0)     | 2,236 (17.2) |                   |
| Symptoms                                       | 1,527 (76.3) | 8,767 (67.3) |                   |
| Incidental                                     | 117 (5.8)    | 475 (3.6)    |                   |
| Not known                                      | 297 (14.8)   | 1,557 (11.9) | < 0.001           |
| Radiotherapy                                   |              |              |                   |
| No                                             | 1,014 (50.6) | 2,835 (21.7) |                   |
| Yes                                            | 339 (16.9)   | 6,996 (53.7) |                   |
| Not known                                      | 649 (32.4)   | 3,204 (24.6) | < 0.001           |
| Chemotherapy                                   |              |              |                   |
| No                                             | 1,107 (55.3) | 5,895 (45.2) |                   |
| Yes                                            | 311 (15.5)   | 4,092 (31.3) |                   |
| Not known                                      | 584 (29.2)   | 3,048 (23.4) | < 0.001           |
| Tamoxifen                                      |              |              |                   |
| No                                             | 260 (13.0)   | 2,233 (17.1) |                   |
| Yes                                            | 1,315 (65.7) | 7,916 (60.7) |                   |
| Not known                                      | 427 (21.3)   | 2,886 (22.1) | < 0.001           |
| Total cases                                    | 2,002        | 13,035       |                   |

\* P-value for comparison of proportions, excluding 'not known' category where present. For age, Charlson index and cancer plan test is for trend; for all other factors test is for heterogeneity.

<sup>a</sup> P-value when 'not known' category is included: < 0.001

Table 5: Crude and adjusted odds ratios and 95% confidence intervals for surgical treatment

| Factor                                      | Number of cases | Surgical cases<br>Number (%) | Odds Ratios  |                     |             |                     |             |
|---------------------------------------------|-----------------|------------------------------|--------------|---------------------|-------------|---------------------|-------------|
|                                             |                 |                              | Unadjusted   |                     | Adjusted *  |                     |             |
|                                             |                 |                              | Odds Ratio   | Confidence Interval | Odds Ratio  | Confidence Interval |             |
| Age at diagnosis (years)                    | < 50            | 3,800                        | 3,587 (94.4) | 1.00                | -           | 1.00                | -           |
|                                             | 50 - 59         | 3,739                        | 3,557 (95.1) | 1.16                | 0.95 - 1.42 | 0.99                | 0.80 - 1.22 |
|                                             | 60 - 69         | 3,042                        | 2,823 (92.8) | 0.77                | 0.63 - 0.93 | 0.73                | 0.59 - 0.89 |
|                                             | 70 - 79         | 2,643                        | 2,117 (80.1) | 0.24                | 0.20 - 0.28 | 0.27                | 0.23 - 0.33 |
|                                             | 80 +            | 1,813                        | 951 (52.5)   | 0.07                | 0.06 - 0.08 | 0.09                | 0.07 - 0.10 |
| Ethnicity                                   | Non-white       | 2,058                        | 1,820 (88.4) | 1.00                | -           | 1.00                | -           |
|                                             | White           | 9,098                        | 8,109 (89.1) | 1.07                | 0.92 - 1.25 | 1.39                | 1.16 - 1.65 |
|                                             | Not known       | 3,881                        | 3,106 (80.0) | 0.52                | 0.45 - 0.61 | 0.93                | 0.77 - 1.11 |
| Distant metastases at diagnosis             | No              | 8,289                        | 7,609 (91.8) | 1.00                | -           | 1.00                | -           |
|                                             | Yes             | 427                          | 276 (64.6)   | 0.16                | 0.13 - 0.20 | 0.16                | 0.12 - 0.20 |
|                                             | Not known       | 6,321                        | 5150 (81.5)  | 0.39                | 0.36 - 0.43 | 0.36                | 0.31 - 0.40 |
| Charlson Index (comorbidities)              | 0 (minor)       | 6,958                        | 6,649 (95.6) | 1.00                | -           | 1.00                | -           |
|                                             | 1 (moderate)    | 407                          | 360 (88.5)   | 0.36                | 0.26 - 0.49 | 0.70                | 0.49 - 0.99 |
|                                             | 2+ (severe)     | 1,615                        | 1,434 (88.8) | 0.37                | 0.30 - 0.45 | 0.50                | 0.41 - 0.62 |
|                                             | Not known       | 6,057                        | 4,592 (75.8) | 0.15                | 0.13 - 0.17 | 0.20                | 0.17 - 0.23 |
| Diagnosis date (In relation to Cancer Plan) | pre 2000        | 9,681                        | 8,345 (86.2) | 1.00                | -           | 1.00                | -           |
|                                             | 2000 - 2003     | 4,189                        | 3,667 (87.5) | 1.12                | 1.01 - 1.25 | 1.11                | 0.97 - 1.27 |
|                                             | post 2003       | 1,167                        | 1,023 (87.7) | 1.14                | 0.95 - 1.37 | 0.75                | 0.60 - 0.94 |
| Presentation                                | Screening       | 2,297                        | 2,236 (97.3) | 1.00                | -           | 1.00                | -           |
|                                             | Symptoms        | 10,294                       | 8,767 (85.2) | 0.16                | 0.12 - 0.20 | 0.34                | 0.26 - 0.45 |
|                                             | Incidental      | 592                          | 475 (80.2)   | 0.11                | 0.08 - 0.15 | 0.28                | 0.20 - 0.40 |
|                                             | Not known       | 1,854                        | 1,557 (84.0) | 0.14                | 0.11 - 0.19 | 0.39                | 0.29 - 0.53 |

\* Adjusted for all other factors, i.e. based on model which includes all factors

**Table 6: Comparison of Audit cohort and registered North Thames cases**

| Year of diagnosis | Cancer Registry database             |                              |              |                        | Breast Audit database    |                              |              |                        |                          |
|-------------------|--------------------------------------|------------------------------|--------------|------------------------|--------------------------|------------------------------|--------------|------------------------|--------------------------|
|                   | No. of registered North Thames cases | Mean (S.D.) age at diagnosis | Total deaths | Deaths within 1 year * | No. of cases submitted + | Mean (S.D.) age at diagnosis | Total deaths | Deaths within 1 year * | No. of trusts submitting |
| 1996              | 4,068                                | 61.5 (14.9)                  | 1,829        | 283 (7.0%)             | 1,380 (33.9%)            | 61.6 (14.8)                  | 577          | 68 (4.9%)              | 21                       |
| 1997              | 4,254                                | 61.4 (14.6)                  | 1,734        | 312 (7.3%)             | 2,611 (61.4%)            | 60.8 (14.3)                  | 1,022        | 161 (6.2%)             | 23                       |
| 1998              | 4,121                                | 62.0 (15.2)                  | 1,581        | 325 (7.9%)             | 2,133 (51.8%)            | 61.8 (15.3)                  | 859          | 144 (6.8%)             | 24                       |
| 1999              | 4,269                                | 61.7 (14.7)                  | 1,513        | 332 (7.8%)             | 2,004 (46.9%)            | 61.4 (14.9)                  | 680          | 130 (6.5%)             | 24                       |
| 2000              | 4,100                                | 61.7 (14.9)                  | 1,309        | 372 (9.1%)             | 2,065 (50.4%)            | 61.2 (14.9)                  | 630          | 159 (7.7%)             | 26                       |
| 2001              | 4,086                                | 61.8 (15.2)                  | 1,160        | 328 (8.0%)             | 1,600 (39.2%)            | 61.3 (15.4)                  | 448          | 120 (7.5%)             | 20                       |
| 2002              | 4,006                                | 61.6 (14.5)                  | 922          | 312 (7.8%)             | 1,280 (32.0%)            | 60.1 (14.9)                  | 280          | 83 (6.5%)              | 16                       |
| 2003              | 4,359                                | 61.6 (14.8)                  | 832          | 331 (7.6%)             | 797 (18.3%)              | 58.7 (15.1)                  | 149          | 51 (6.4%)              | 13                       |
| 2004              | 4,238                                | 61.9 (14.6)                  | 591          | 316 (7.5%)             | 563 (13.3%)              | 58.4 (14.8)                  | 81           | 36 (6.4%)              | 8                        |
| 2005              | 3,400                                | 61.4 (14.6)                  | 282          | 220 (6.5%)             | 604 (17.8%)              | 59.0 (14.5)                  | 39           | 28 (4.6%)              | 7                        |
| Total             | 40,901                               | 61.7 (14.8)                  | 11,753       | 3,131 (7.7%)           | 15,037 (36.8%)           | 60.9 (14.9)                  | 4,765        | 980 (6.5%)             | 29                       |

\* Figures in brackets are deaths within 1 year as a percentage of total cases

+ Figures in brackets are audit cases as a percentage of total registered cases

## References

- 1  
2  
3  
4  
5  
6 (1) Berrino F, Verdecchia A, Lutz JM, Lombardo C, Micheli A, Capocaccia R. Comparative cancer survival  
7 information in Europe. *Eur J Cancer* 2009; 45(6): 901-08.
- 8  
9 (2) Verdecchia A, Francisci S, Brenner H, Gatta G, Micheli A, Mangone L et al. Recent cancer survival in  
10 Europe: a 2000-02 period analysis of EURO CARE-4 data. *Lancet Oncol* 2007; 8(9): 784-96.
- 11  
12 (3) Sant M, Capocaccia R, Verdecchia A, Esteve J, Gatta G, Micheli A et al. Survival of women with breast  
13 cancer in Europe: variation with age, year of diagnosis and country. The EURO CARE Working Group.  
14 *Int J Cancer* 1998; 77(5): 679-83.
- 15  
16 (4) Møller H, Sandin F, Bray F, Klint A, Linklater KM, Purushotham A et al. Breast cancer survival in  
17 England, Norway and Sweden: a population-based comparison. *Int J Cancer* 2010; 127(11): 2630-38.
- 18  
19 (5) Beral V, Peto R. UK cancer survival statistics. *BMJ* 2010; 341: c4112.
- 20  
21 (6) Møller H, Richards S, Hanchett N, Riaz SP, Lüchtenborg M, Holmberg L, Robinson D. Completeness of  
22 case ascertainment and survival time error in English cancer registries: impact on one-year survival  
23 estimates. *Br J Cancer* 2011; 105: 170-6.
- 24  
25 (7) Robinson D, Sankila R, Hakulinen T, Moller H. Interpreting international comparisons of cancer survival:  
26 the effects of incomplete registration and the presence of death certificate only cases on survival  
27 estimates. *Eur J Cancer* 2007; 43(5): 909-13.
- 28  
29 (8) Rachet B, Maringe C, Nur U, Quaresma M, Shah A, Woods LM et al. Population-based cancer survival  
30 trends in England and Wales up to 2007: an assessment of the NHS cancer plan for England. *Lancet*  
31 *Oncol* 2009; 10(4): 351-69.
- 32  
33 (9) Charlson ME, Pompei P, Ales KL, MacKenzie CR. A new method of classifying prognostic comorbidity  
34 in longitudinal studies: development and validation. *J Chronic Dis* 1987; 40(5): 373-83.
- 35  
36 (10) Janssen-Heijnen ML, Maas HA, Houterman S, Lemmens VE, Rutten HJ, Coebergh JW. Comorbidity in  
37 older surgical cancer patients: influence on patient care and outcome. *Eur J Cancer* 2007; 43(15): 2179-  
38 93.
- 39  
40 (11) Lavelle K, Moran A, Howell A, Bundred N, Campbell M, Todd C. Older women with operable breast  
41 cancer are less likely to have surgery. *Br J Surg* 2007; 94(10): 1209-15.
- 42  
43 (12) Haggstrom DA, Quale C, Smith-Bindman R. Differences in the quality of breast cancer care among  
44 vulnerable populations. *Cancer* 2005; 104(11): 2347-58.
- 45  
46 (13) Ugnat AM, Xie L, Morriss J, Semenciw R, Mao Y. Survival of women with breast cancer in Ottawa,  
47 Canada: variation with age, stage, histology, grade and treatment. *Br J Cancer* 2004; 90(6): 1138-43.
- 48  
49 (14) Bouchardy C, Rapiti E, Fioretta G, Laissue P, Neyroud-Caspar I, Schafer P et al. Undertreatment  
50 strongly decreases prognosis of breast cancer in elderly women. *J Clin Oncol* 2003; 21(19): 3580-87.
- 51  
52 (15) Yancik R, Wesley MN, Ries LA, Havlik RJ, Edwards BK, Yates JW. Effect of age and comorbidity in  
53 postmenopausal breast cancer patients aged 55 years and older. *JAMA* 2001; 285(7): 885-92.
- 54  
55 (16) Busch E, Kemeny M, Fremgen A, Osteen RT, Winchester DP, Clive RE. Patterns of breast cancer care  
56 in the elderly. *Cancer* 1996; 78(1): 101-11.
- 57  
58  
59  
60

- 1  
2  
3  
4  
5  
6  
7  
8  
9  
10  
11  
12  
13  
14  
15  
16  
17  
18  
19  
20  
21  
22  
23  
24  
25  
26  
27  
28  
29  
30  
31  
32  
33  
34  
35  
36  
37  
38  
39  
40  
41  
42  
43  
44  
45  
46  
47  
48  
49  
50  
51  
52  
53  
54  
55  
56  
57  
58  
59  
60
- (17) Ballard-Barbash R, Potosky AL, Harlan LC, Nayfield SG, Kessler LG. Factors associated with surgical and radiation therapy for early stage breast cancer in older women. *J Natl Cancer Inst* 1996; 88(11): 716-26.
  - (18) Eaker S, Dickman PW, Bergkvist L, Holmberg L. Differences in management of older women influence breast cancer survival: results from a population-based database in Sweden. *PLoS Med* 2006; 3(3): e25.
  - (19) Sant M, Allemani C, Capocaccia R, Hakulinen T, Aareleid T, Coebergh JW et al. Stage at diagnosis is a key explanation of differences in breast cancer survival across Europe. *Int J Cancer* 2003; 106(3): 416-22.
  - (20) Soerjomataram I, Louwman MW, Ribot JG, Roukema JA, Coebergh JW. An overview of prognostic factors for long-term survivors of breast cancer. *Breast Cancer Res Treat* 2008; 107(3): 309-30.
  - (21) Carter CL, Allen C, Henson DE. Relation of tumor size, lymph node status, and survival in 24,740 breast cancer cases. *Cancer* 1989; 63(1):181-7.
  - (22) Brewster DH, Clark DI, Stockton DL, Munro AJ, Steele RJ. Characteristics of patients dying within 30 days of diagnosis of breast or colorectal cancer in Scotland, 2003-2007. *Br J Cancer* 2011; 104(1): 60-7.
  - (23) National Cancer Intelligence Network. The Second All Breast Cancer Report. NCIN: June 2011. [www.ncin.org.uk/home.aspx](http://www.ncin.org.uk/home.aspx) (accessed 19 June 2011).
  - (24) Lavelle K, Todd C, Moran A, Howell A, Bundred N, Campbell M. Non-standard management of breast cancer increases with age in the UK: a population based cohort of women 65 years. *Br J Cancer* 2007; 96: 1197-1203.
  - (25) Cronin-Fenton DP, Norgaard M, Jacobsen J, Garne JP, Ewertz M, Lash TL et al. Comorbidity and survival of Danish breast cancer patients from 1995 to 2005. *Br J Cancer* 2007; 96(9):1462-8.
  - (26) Tataru D, Robinson D, Moller H, Davies E. Trends in the treatment of breast cancer in Southeast England following the introduction of national guidelines. *J Public Health (Oxf)* 2006; 28(3): 215-7.
  - (27) Macleod U, Ross S, Gillis C, McConnachie A, Twelves C, Watt GC. Socio-economic deprivation and stage of disease at presentation in women with breast cancer. *Ann Oncol* 2000; 11(1): 105-7.
  - (28) Macleod U, Ross S, Twelves C, George WD, Gillis C, Watt GC. Primary and secondary care management of women with early breast cancer from affluent and deprived areas: retrospective review of hospital and general practice records. *BMJ* 2000; 320(7247): 1442-5.
  - (29) Downing A, Prakash K, Gilthorpe MS, Mikeljevic JS, Forman D. Socioeconomic background in relation to stage at diagnosis, treatment and survival in women with breast cancer. *Br J Cancer* 2007; 96(5): 836-40.
  - (30) Department of Health. The NHS Cancer plan: a plan for investment, a plan for reform. 2000. London, Department of Health.
  - (31) House of Commons. The NHS Cancer Plan: a progress report. 2005. London, The Stationery Office.
  - (32) Department of Health. Cancer Reform Strategy. 2007. London, Department of Health.
  - (33) Hoy AR, Patrick H, Campbell B, Lyratzopoulos G. Measuring the influence of colleagues on a consultant team's use of breast conserving surgery. *Int J Technol Assess Health Care* 2010; 26(2): 156-162.

- 1  
2  
3  
4 (34) Office for National Statistics. Breast Cancer: Incidence rates rise, mortality rates fall. October 2010.  
5 www.statistics.gov.uk/cci/nugget.asp?id=575 (accessed 19 June 2011).  
6  
7  
8  
9  
10  
11  
12  
13  
14  
15  
16  
17  
18  
19  
20  
21  
22  
23  
24  
25  
26  
27  
28  
29  
30  
31  
32  
33  
34  
35  
36  
37  
38  
39  
40  
41  
42  
43  
44  
45  
46  
47  
48  
49  
50  
51  
52  
53  
54  
55  
56  
57  
58  
59  
60

For peer review only
